1 Leptin regulates glucose homeostasis via  
2 the canonical WNT pathway.

3

4 Kaj Kamstra<sup>1\*</sup>, Mohammed Z. Rizwan<sup>2\*</sup>, Julia A. Horsfield<sup>3</sup>, Dominik Pretz<sup>1</sup>, Peter  
5 R. Shepherd<sup>4</sup>, David R. Grattan<sup>2\*</sup> and Alexander Tups<sup>1\*</sup>

6 <sup>1</sup>Centre for Neuroendocrinology, Department of Physiology, School of Biomedical Sciences,  
7 University of Otago, Dunedin, New Zealand

8 <sup>2</sup>Centre for Neuroendocrinology, Department of Anatomy, School of Biomedical Sciences,  
9 University of Otago, Dunedin, New Zealand

10 <sup>3</sup> Department of Pathology, Otago School of Medicine, University of Otago, Dunedin, New  
11 Zealand

12 <sup>4</sup> Department of Molecular Medicine and Pathology, University of Auckland, Auckland, New  
13 Zealand

14 \* These authors contributed equally

15

16

17 **Correspondence to:**

18 Dr. Alexander Tups

19 Department of Physiology

20 University of Otago

21 PO Box 56

22 Dunedin, New Zealand

23 E-mail: [alexander.tups@otago.ac.nz](mailto:alexander.tups@otago.ac.nz)

24 Telephone number: 0064 3 479 4862

25 Fax number: 0064 3 479 7323

26

27

## 28 Summary

29 Leptin is a body weight regulatory hormone, but it is arguably even more potent at regulating blood  
30 glucose levels. To further our understanding of the molecular mechanisms by which leptin controls  
31 glucose homeostasis, we have used transgenic zebrafish models and conditional deletion of beta  
32 catenin in the mediobasal hypothalamus of adult mice to show that Wnt signalling in the brain  
33 mediates gluco-regulatory effects of leptin. In zebrafish, under normal feeding conditions, leptin  
34 regulates glucose homeostasis but not adipostasis. In times of nutrient excess, we found that leptin  
35 also regulates body weight and size in this species. Using a Wnt signalling reporter fish, we show  
36 that leptin directly activates the canonical Wnt pathway *in vivo*. Pharmacological inhibition of this  
37 pathway prevented the leptin-induced improvement in glucose tolerance. In adult mice, conditional  
38 deletion of the key Wnt effector molecule,  $\beta$ -catenin, in the mediobasal hypothalamus of male  
39 mice confirmed the essential role of the Wnt pathway in mediating leptin action and the  
40 neuroendocrine regulation of glucose homeostasis. Adult-onset  $\beta$ -catenin deletion in the  
41 mediobasal hypothalamus led to glucose intolerance, exacerbation of caloric intake and body  
42 weight gain under high fat diet, as well as resistance to exogenous leptin.

43 Keywords: leptin, Wnt, glucose homeostasis, zebrafish, TCF712, beta catenin

## 44 Introduction

45 The hormone leptin is known for its role in regulating energy balance. Although leptin is the  
46 primary adipostatic factor in mammals, it is well-established that leptin also regulates glucose  
47 homeostasis, independent of its adipostatic actions [1-5]: First, leptin is more potent at regulating  
48 glucose levels in blood than it is at suppressing appetite [6]. Second, acute disruption of leptin  
49 action *in vivo* raises blood glucose and plasma insulin levels before effects on body weight become  
50 apparent, and treatment of leptin-deficient  $Lep^{ob/ob}$  mice with leptin corrects glucose levels before  
51 body mass [7]. Third,  $Lep^{ob/ob}$  and leptin receptor-deficient  $Lepr^{db/db}$  mice become  
52 hyperinsulinemic before they become obese [8]. Fourth, humans who suffer from lipodystrophy,  
53 and rodent models of this disease, characterized by very low body fat and leptin levels, exhibit  
54 hyperglycemia, hyperinsulinemia and insulin resistance. All of these symptoms are corrected by  
55 leptin therapy [9, 10], which received approval by the FDA for this treatment purpose [11]. While  
56 leptin predominantly acts through the janus kinase 2 – signal transducer and activator of  
57 transcription 3 (JAK2-STAT3) pathway to regulate body weight [12-15], it seems that alternative  
58 pathways mediate the effect on glucose homeostasis [16, 17]. However, these pathways remain  
59 poorly defined.

60 Genome-wide association studies (GWAS) identified polymorphisms in several genes of the  
61 canonical Wnt pathway that increase the risk of glucose intolerance and type 2 diabetes (T2DM)  
62 [18-20]. The strongest effect size was associated with polymorphisms in the transcription factor 7-  
63 like 2 (*TCF7L2*) gene [21], which encodes a transcription factor of the canonical Wnt pathway.  
64 Wnt signalling is activated when a Wnt ligand binds to the frizzled (Fzd) receptor, which  
65 subsequently forms a complex with the co-receptor lipoprotein related protein (LRP) 5/6. This

66 causes disheveled (Dvl) to phosphorylate LRP, which then inactivates glycogen synthase kinase  
67  $3\beta$  (GSK3 $\beta$ ). GSK3 $\beta$  inactivation decreases phosphorylation of the transcriptional co-activator  $\beta$ -  
68 catenin. Stabilized  $\beta$ -catenin then enters the nucleus where it associates with transcription factors,  
69 such as TCF712, to ultimately regulate the transcription of downstream target genes [22]. Although  
70 canonical Wnt signalling has been studied extensively in the contexts of embryonic development  
71 and tumorigenesis, much less is known about its role in energy homeostasis [23]. Our laboratory  
72 showed that canonical Wnt signalling, specifically in the hypothalamus, is impaired during obesity  
73 and reinstated by leptin treatment [24]. Furthermore, we showed that GSK3 $\beta$  action specifically in  
74 the hypothalamus appears essential for glucose homeostasis. Lep<sup>ob/ob</sup> mice were found to have  
75 elevated levels of active hypothalamic GSK3 $\beta$ , and glucose intolerance in these mice was acutely  
76 ameliorated by intracerebroventricular injection of a GSK3 $\beta$  inhibitor [25].

77 To test the hypothesis that leptin regulates glucose homeostasis via the canonical Wnt pathway,  
78 we decided to evaluate leptin action in a zebrafish model. Leptin signalling is evolutionarily well-  
79 conserved. Homologues for leptin and the leptin receptor are present even in invertebrate species  
80 like *Drosophila melanogaster* [26], and although leptin from species of different animal classes  
81 have low primary sequence homology, the secondary, tertiary, and quaternary structure, as well as  
82 key amino acids required for leptin's physiological activity, are evolutionarily conserved [27].  
83 Zebrafish (*Danio rerio*) express two leptin paralogues: leptin-a and leptin-b [28]. Both, like all  
84 vertebrate leptin paralogues, consist of four alpha helices, and contain a pair of cysteine residues  
85 that form a disulfide bridge. Three receptor interaction sites have been mapped, and each of these  
86 has at least some degree of amino acid sequence conservation [29]. Despite the conservation  
87 between species, it has been reported that leptin does not mediate adipostasis in zebrafish, but  
88 rather has an essential role in regulation of glucose homeostasis [30]. These data suggest that the

89 glucoregulatory actions of leptin may, in fact, be the evolutionarily earlier function, with  
90 adipostasis added in higher vertebrates.

91 Here, we have used a transgenic Wnt-reporter zebrafish line to demonstrate that leptin activates  
92 canonical Wnt signaling, mediated via the leptin receptor, and that this pathway contributes to the  
93 glucoregulatory action of leptin. We subsequently tested whether this action is preserved in  
94 mammals, using conditional ablation of  $\beta$ -catenin in the mediobasal hypothalamus (MBH) of adult  
95 mice to prevent Wnt signalling. Mice lacking  $\beta$ -catenin in the MBH showed impaired glucose  
96 tolerance, and when on a high fat diet, they also showed markedly increased weight gain. These  
97 data demonstrate an essential role of the canonical Wnt pathway for mediating leptin action in the  
98 hypothalamus and show that this action contributes to the regulation of glucose homeostasis.

99

## 100 Results

### 101 Leptin activates the canonical Wnt pathway in vivo

102 To investigate whether leptin activates the canonical Wnt pathway, we used a transgenic zebrafish  
103 line (*Tg(7xTCF-Xla.Siam:nlsCherry)<sup>ia5</sup>*) that sensitively detects translocation of the TCF712- $\beta$ -  
104 catenin complex into the nucleus, thereby indicating canonical Wnt pathway activity [31]. Because  
105 the Wnt pathway is strongly active in embryonic patterning, we first established that at 5 days post  
106 fertilization (dpf), the developmental Wnt pathway activity has subsided to a level where it is  
107 mostly confined to the heart (figure 1A). The canonical Wnt pathway can be pharmacologically  
108 activated with lithium chloride (LiCl), which inhibits GSK3 $\beta$  [32], or inhibited with pyrvinium  
109 pamoate or PNU74654. Pyrvinium pamoate is an anti-helminthic drug that potentiates the activity  
110 of casein kinase 1 $\alpha$  (CK1 $\alpha$ ), leading to enhanced degradation of  $\beta$ -catenin [33]. PNU74654  
111 disrupts the interaction between  $\beta$ -catenin and TCF/LEF transcription factors [34]. We  
112 demonstrated that pharmacological activation or inhibition of the canonical Wnt pathway reliably  
113 increases or decreases the fluorescent signal in *Tg(7xTCF-Xla.Siam:nlsCherry)<sup>ia5</sup>* larvae in  
114 multiple tissues, particularly the heart but also in the hypothalamus (figure 1B,C). Strikingly,  
115 recombinant mouse leptin appeared to be efficacious in zebrafish, and treating 5 dpf *Tg(7xTCF-*  
116 *Xla.Siam:nlsCherry)<sup>ia5</sup>* larvae with leptin (100 nM) for 2 hours led to robust activation of the  
117 fluorescent construct specifically in the hypothalamus (figure 1D-F). In the hypothalamus, leptin  
118 increased fluorescence intensity significantly compared with vehicle-treated larvae, whereas in the  
119 heart leptin did not significantly increase fluorescence intensity.

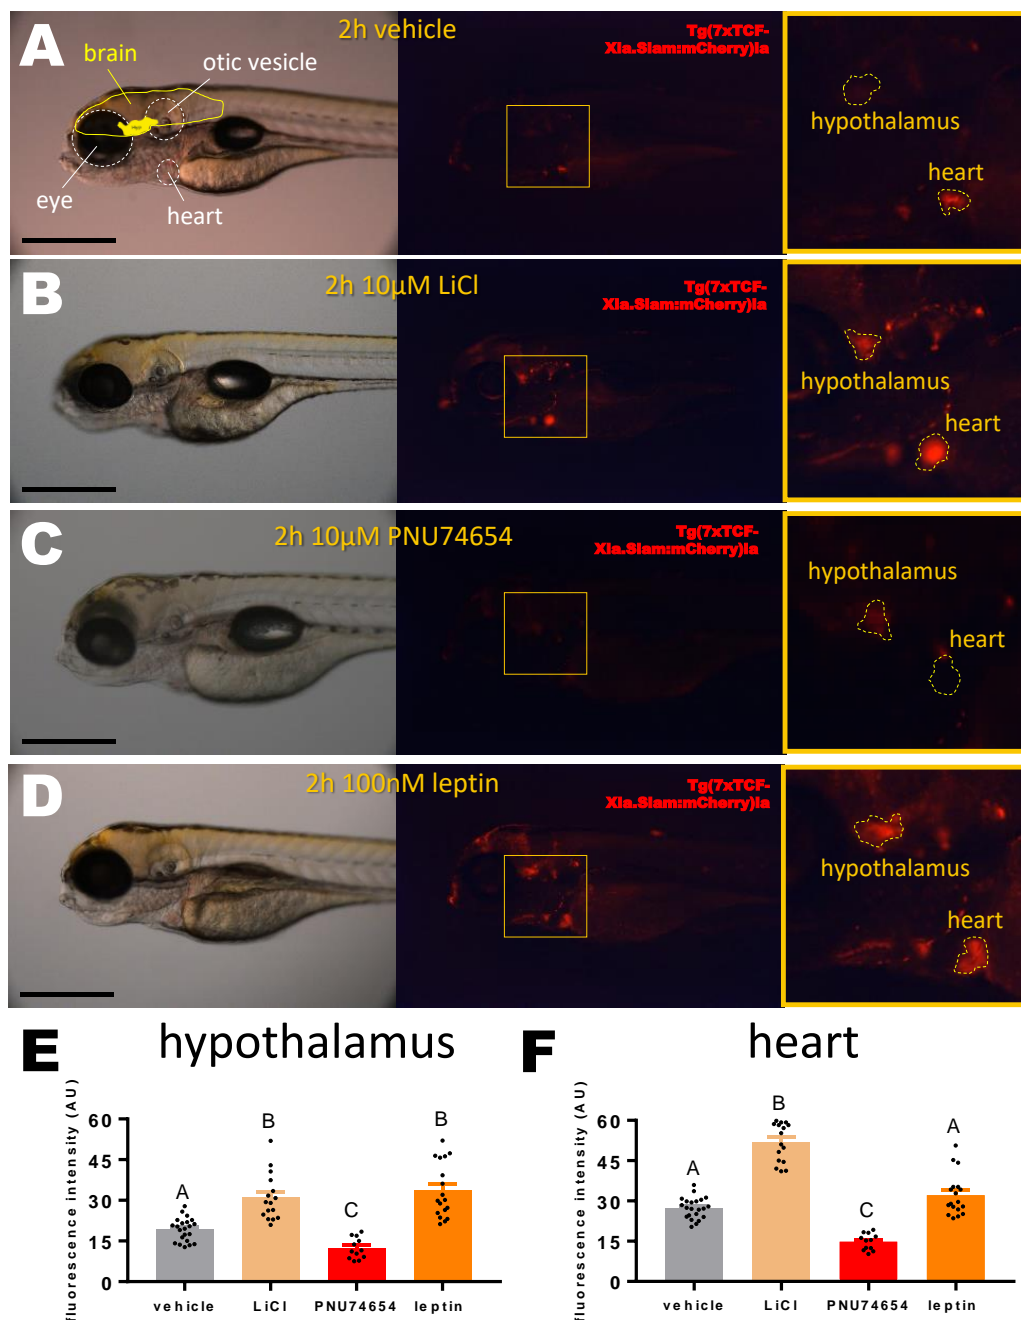

120

121 **Figure 1** Wnt pathway activation by leptin in *Tg(7xTCFXla.Siam:nlsmCherry)<sup>ia5</sup>* larvae.

122 (A) 5dpf *Tg(7xTCFXla.Siam:nlsmCherry)<sup>ia5</sup>* larvae treated with vehicle (Cortland salt solution). Left: bright field image, with  
 123 anatomical landmarks encircled; Middle: Epifluorescence image; Right: Magnification of yellow box in middle image, with  
 124 hypothalamus and heart encircled. Scale bar = 500  $\mu$ m. (B) 5dpf *Tg(7xTCFXla.Siam:nlsmCherry)<sup>ia5</sup>* larvae treated with 10  $\mu$ M  
 125 LiCl for 2 hours. (C) 5dpf *Tg(7xTCFXla.Siam:nlsmCherry)<sup>ia5</sup>* larvae treated with 10  $\mu$ M PNU74654 for 2 hours. (D) 5 dpf  
 126 *Tg(7xTCFXla.Siam:nlsmCherry)<sup>ia5</sup>* larvae treated with 100 nM recombinant leptin for 2 hours. (E) Fluorescence intensity in the  
 127 hypothalamus of differentially treated 5 dpf *Tg(7xTCFXla.Siam:nlsmCherry)<sup>ia5</sup>* larvae. A-B=P<0.05, one-way ANOVA. (F)  
 128 Fluorescence intensity in the heart of differentially treated 5 dpf *Tg(7xTCFXla.Siam:nlsmCherry)<sup>ia5</sup>* larvae. Means  $\pm$  SEM, A-  
 129 B=P<0.05, one-way ANOVA.

## 130 Leptin treatment ameliorates hyperglycemia in leptin deficient and wild type zebrafish

131 To further investigate the mechanism of leptin action on Wnt signaling, we created CRISPR-  
132 mediated knockout zebrafish lines on an AB<sub>z</sub> background (figure S1), and conducted a series of  
133 studies to evaluate body weight and glucose homeostasis in lacking *leptin-a* (*lepa<sup>nz301</sup>*), *leptin-b*  
134 (*lepb<sup>nz302</sup>*) or the leptin receptor (*lepr<sup>nz303</sup>*). Raising the fish at identical tank densities, we found  
135 that body weight and standard length did not differ between wild type zebrafish and any of the  
136 knockout lines that were created (figure S2, S3), neither in males nor females at four, six or twelve  
137 months of age. To investigate whether leptin ameliorates hyperglycemia in leptin- or leptin  
138 receptor-deficient zebrafish, we induced a hyperglycemic state by immersing male and female  
139 zebrafish (n=5) in a 1% glucose solution for four days [35]. Immersion in 1% glucose steadily  
140 elevated basal blood glucose levels at a rate of 15-20 mg/dl per day, whereas immersion in normal  
141 system water did not change basal blood glucose levels (figure 2A-D). On the third day of  
142 immersion, one hour before blood sampling, fish were treated with either recombinant mouse  
143 leptin (2 mg/kg) or vehicle (Cortland salt solution). Leptin ameliorated hyperglycemia in wild-  
144 type and both leptin-a and leptin-b deficient zebrafish (figure S4), but not in leptin receptor-  
145 deficient zebrafish (figure 2C, D). Interestingly, the pattern of blood glucose elevation, and the  
146 effect of leptin on hyperglycemia was identical between males and females. Female zebrafish have  
147 a more variable body weight compared with males, due to the fact that they continuously produce  
148 eggs, which can make up to 25% of their total mass. For these reasons we performed all subsequent  
149 experiments in males only.



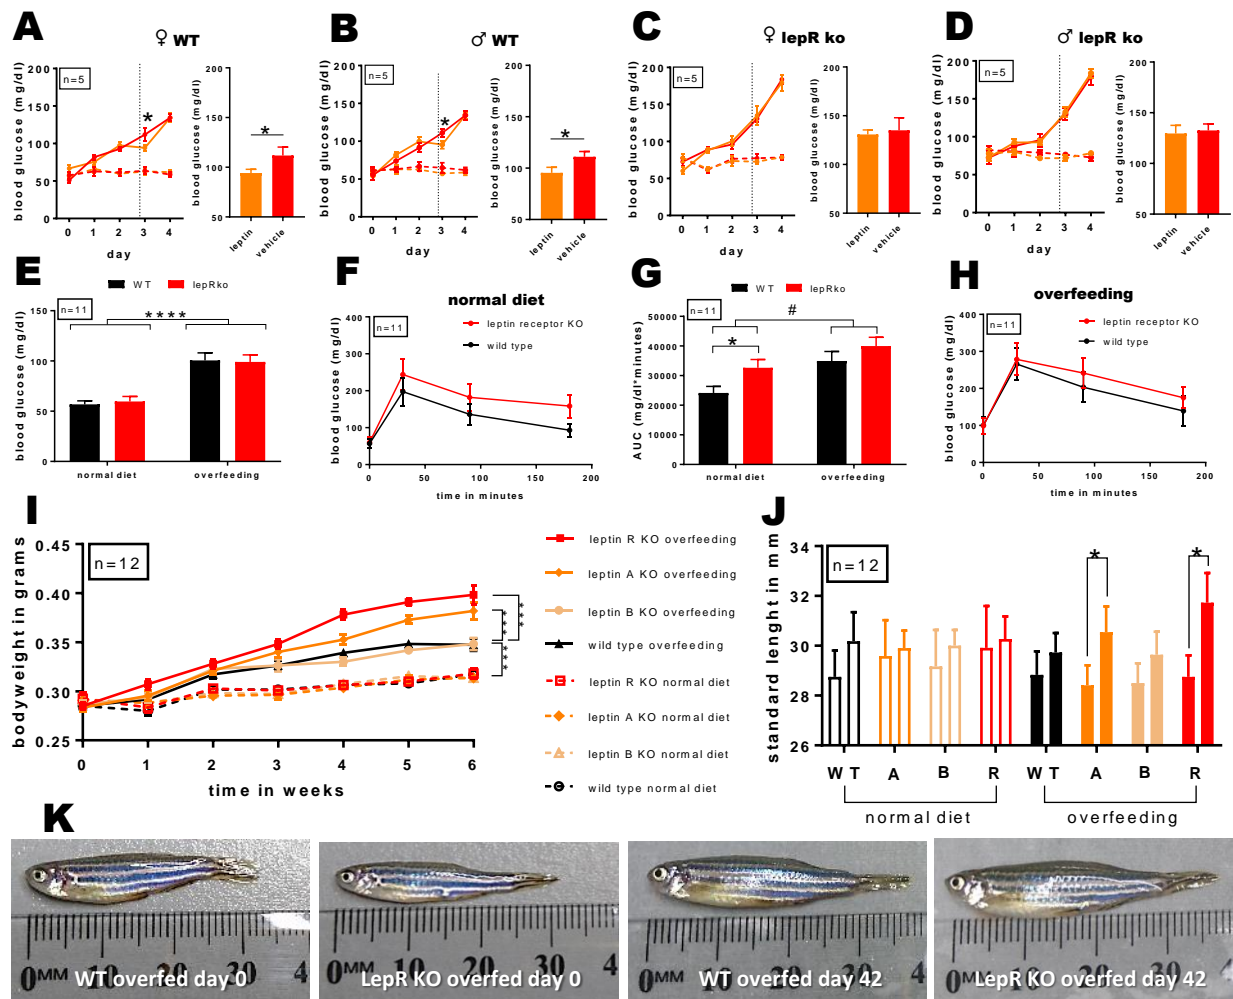

150

151 **Figure 2 Regulation of glucose homeostasis and body weight in zebrafish.**

152  
 153 (A-D) Blood glucose values of male and female wild type and leptin receptor deficient “lep<sup>nz303</sup>” zebrafish over time following  
 154 immersion in a 1% glucose solution (left; solid lines = 1% glucose immersion, dotted lines = normal water immersion; \*P<0.05,  
 155 repeated measures ANOVA). On the third day, one hour before blood sampling, fish were injected intraperitoneally with  
 156 recombinant mouse leptin (2mg/kg) or vehicle (right). Data displayed as mean±SEM. (E) Baseline blood glucose levels of lep<sup>nz303</sup>  
 157 fish and wild type controls. \*\*\*\*P<0.0001, two-way ANOVA. (F) Glucose tolerance in lep<sup>nz303</sup> fish and wild type controls (n=12).  
 158 (G) Area under the curve of (F) and (H). \*P<0.05, one-way ANOVA; #P<0.05, two-way ANOVA. (H) Glucose tolerance in overfed  
 159 lep<sup>nz303</sup> fish and wild type controls (n=12). (I) Body weights of lep<sup>nz301</sup> fish, lep<sup>nz302</sup> fish, lep<sup>nz303</sup> fish and wild type controls on  
 160 a 6-week normal diet or overfeeding regime. \*\*\*P<0.001, repeated measures ANOVA. (J) Standard length of normal-fed and  
 161 overfed lep<sup>nz301</sup> fish, lep<sup>nz302</sup> fish, lep<sup>nz303</sup> fish and wild type controls at the start (left) and end (right) of the feeding paradigm.  
 162 \*P<0.05, one-way ANOVA. (K) Examples of leptin receptor deficient and wild type zebrafish at the start and end of the overfeeding  
 163 regime.

## 164 Overfeeding reveals an effect of leptin on body size regulation in zebrafish

165 Our data are consistent with earlier studies suggesting that under normal feeding conditions, leptin  
166 regulates glucose homeostasis but not adipostasis in the zebrafish [30]. We next investigated  
167 whether leptin- and leptin receptor-deficient zebrafish were more prone to impaired glucose  
168 tolerance or diet-induced obesity (DIO). To this end, we exposed *lepa<sup>nz301</sup>* fish, *lepb<sup>nz302</sup>* fish,  
169 *lepr<sup>nz303</sup>* fish, or wild-type control fish (n=12) to an overfeeding regime or a normal diet for six  
170 weeks. Glucose tolerance was tested at the start and end of this period. Intraperitoneal glucose  
171 tolerance tests (ipGTTs) revealed that although basal blood glucose levels were not significantly  
172 different (figure 2E), glucose clearance in leptin receptor knockout fish was reduced by 26%  
173 compared with wild type fish (figure 2F, G). Overfeeding increased basal blood glucose levels  
174 (from  $64.1 \pm 3.5$  to  $100.5 \pm 1.8$  mg/dl,  $P < 0.001$ ) and impaired glucose tolerance by 25%, independent  
175 of genotype (figure 2E, G, H). Surprisingly, we found that overfeeding also revealed an effect of  
176 leptin on body weight, with *lepr<sup>nz303</sup>* ( $0.40 \pm 0.01$  g,  $P < 0.001$ ) and *lepa<sup>nz301</sup>* ( $0.38 \pm 0.01$  g,  $P < 0.001$ ),  
177 but not *lepb<sup>nz302</sup>* fish ( $0.35 \pm 0.01$  g) having significantly increased body weight compared to  
178 overfed wild type controls ( $0.34 \pm 0.01$  g; figure 2I). There was also an increase in standard length  
179 from  $28.4 \pm 0.2$  mm to  $30.5 \pm 0.3$  mm ( $P < 0.05$ ) in *lepa<sup>nz301</sup>* fish and  $28.8 \pm 0.25$  mm to  $31.7 \pm 0.36$  mm  
180 ( $P < 0.05$ ) in *lepr<sup>nz303</sup>* fish (figure 2 J, K). These results confirm that in zebrafish, under normal  
181 feeding conditions, leptin regulates glucose homeostasis but not body weight, consistent with the  
182 concept that this might be the evolutionarily conserved role of leptin. However, in times of nutrient  
183 excess, leptin did impact on both body weight and standard length.

184 Activation of the canonical Wnt pathway and glucose lowering effects of leptin are  
185 dependent on a functional leptin receptor

186 Using the Crispr/Cas9 transgenic lines, we could investigate whether the glucoregulatory actions  
187 of canonical Wnt signalling are dependent on a functional leptin system. To confirm that Wnt  
188 reporter activation was mediated through leptin signalling, we used CRISPR/Cas9 to create *lepr*  
189 ‘crispants’ that are mosaic for leptin receptor knockout, and incubated them with either  
190 recombinant leptin or 10  $\mu$ M LiCl (figure 3A) at 5 dpf. Mosaic knockout of the leptin receptor  
191 blocked the ability of leptin, but not that of LiCl to activate WNT signaling in the hypothalamus  
192 (figure 3B). We revisited the experimental paradigms described above to evaluate whether LiCl-  
193 induced activation of Wnt signalling could mimic the action of leptin in improving glucose  
194 tolerance, using *lepa*<sup>nz301</sup> fish, *lepb*<sup>nz302</sup> fish and *lepr*<sup>nz303</sup> fish. Leptin treatment improved glucose  
195 tolerance in *lepa*<sup>nz301</sup> fish (by 30%, figure 3C, F) and *lepb*<sup>nz302</sup> fish (by 20% figure 3D, G). In  
196 *lepr*<sup>nz303</sup> zebrafish, leptin was unable to improve glucose tolerance with levels identical to the  
197 control group (figure 3E, H). LiCl treatment improved glucose tolerance in all groups (22% for  
198 *lepa*<sup>nz301</sup> fish, 15% for *lepb*<sup>nz302</sup> fish, and 28% for *lepr*<sup>nz303</sup> fish), demonstrating that a functional  
199 leptin receptor is not required for the glucose lowering effect of LiCl. No additive effect was found  
200 between leptin and LiCl.

201 In accordance, LiCl treatment attenuated persistent hyperglycemia in *lepa*<sup>nz301</sup> fish (126.0 $\pm$ 6.1 vs  
202 102.0 $\pm$ 6.5 mg/dl; figure 3 I), *lepb*<sup>nz302</sup> fish (121.5 $\pm$ 3.8 vs 95.7 $\pm$ 7.8 mg/dl; figure 3 J) and *lepr*<sup>nz303</sup>  
203 zebrafish (130.1 $\pm$ 6.6 vs 102.0 $\pm$ 6.5 mg/dl; figure 3 K). The effect of LiCl on blood glucose levels  
204 appears to be longer lasting than the effect of leptin (figure 2). LiCl-treated fish had significantly  
205 lower blood glucose levels not only immediately after the treatment ended, but on the following

206 day as well (155.8±6.1 vs 127.5±6.7 mg/dl for *lepa*<sup>nz301</sup> fish; 146.7±8.2 vs 122.5±9.4 mg/dl for  
 207 *lepb*<sup>nz302</sup> fish; 178.2±5.3 vs 127.5±7.2 mg/dl for *lepr*<sup>nz303</sup> fish). Together, these data demonstrate  
 208 that canonical Wnt pathway activation via LiCl-mediated inhibition of GSK3β regulates glucose  
 209 homeostasis even in the absence of an intact leptin system.

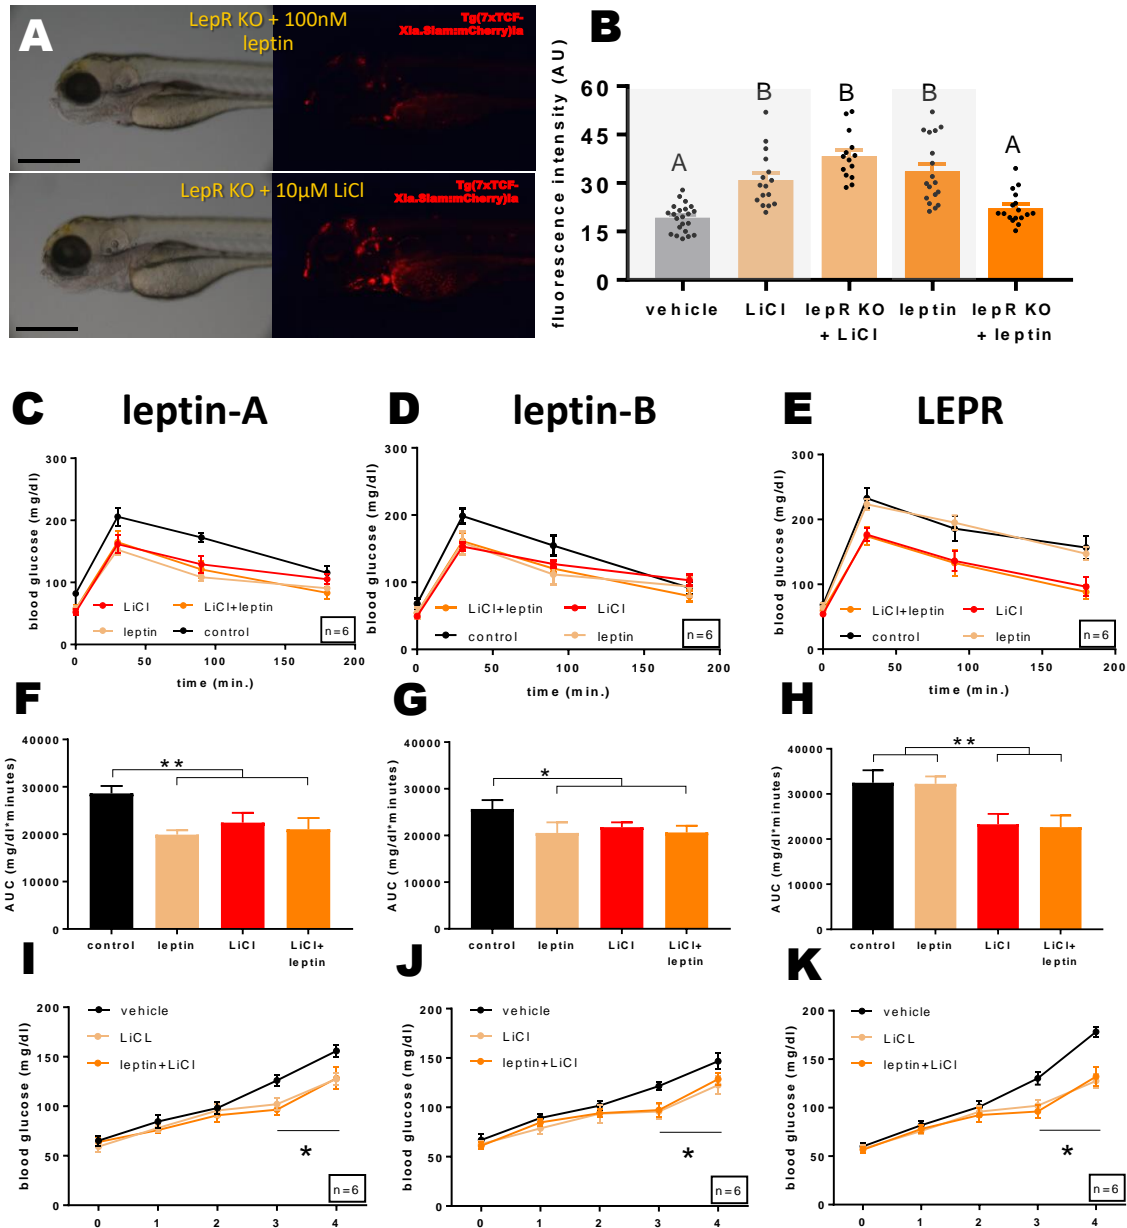

210

211 *Figure 3 Activation of canonical Wnt signalling improves glucose tolerance in lepa<sup>nz301</sup> fish, lepb<sup>nz302</sup> fish and lepr<sup>nz303</sup>*  
 212 *zebrafish.*

213  
214 (A) 5 dpf CRISPR-mediated leptin receptor-deficient *Tg(7xTCF-Xla.Siam:nlsMCherry)<sup>ia5</sup>* larvae treated with 100 nM recombinant  
215 leptin or 10  $\mu$ M LiCl for 2 hours. Scale bar = 500  $\mu$ M. (B) Fluorescence intensity in the hypothalamus of differentially treated 5  
216 dpf *Tg(7xTCF-Xla.Siam:nlsMCherry)<sup>ia5</sup>* larvae. A-B= $P$ <0.05, one-way ANOVA. (C) Glucose tolerance of adult male *lepa<sup>nz301</sup>*  
217 zebrafish ( $n=6$ ). Fish were treated with 10  $\mu$ M LiCl (three hours before glucose injection), with 0.6 g/L of recombinant mouse  
218 leptin dissolved in Cortland salt solution (one hour before glucose injection), with vehicle only, or with a combination of LiCl and  
219 leptin. Following 0.5 mg/g glucose injection, blood samples were taken at 30, 90, and 180 minutes post injection. (D) Same as (C),  
220 but for *lepb<sup>nz302</sup>* fish. (E) Same as (C) and (B), but for *lepr<sup>nz303</sup>* fish. (F) Area under the curve of (C). \*\* $P$ <0.001, one-way ANOVA.  
221 (G) Area under the curve of (D). \* $P$ <0.05, one-way ANOVA. (H) Area under the curve of (E). \*\* $P$ <0.001, one-way ANOVA. (I)  
222 Blood glucose values of adult male *lepa<sup>nz301</sup>* zebrafish ( $n=6$ ) over the course of a 4-day immersion in a 1% glucose solution. On  
223 the third day, fish were exposed to 10  $\mu$ M LiCl for three hours before daily blood sampling. One hour before blood sampling, fish  
224 were injected intraperitoneally with 0.6 g/L of recombinant mouse leptin dissolved in Cortland salt solution, or with vehicle only.  
225 \* $P$ <0.05, repeated measures ANOVA. (J) Same as (G), but for *lepb<sup>nz302</sup>* fish. \* $P$ <0.05, repeated measures ANOVA. (K) Same as  
226 (G) and (H), but for *lepr<sup>nz303</sup>* fish. \* $P$ <0.05, repeated measures ANOVA.

## 227 Inhibition of the canonical Wnt pathway blocks the glucoregulatory effect of leptin

228 To investigate whether the leptin-induced activation of Wnt is involved in mediating leptin action  
229 on glucose homeostasis, we pharmacologically activated or inhibited the canonical Wnt pathway,  
230 induced hyperglycemia acutely or persistently and then treated the fish with leptin. During an acute  
231 glycemic challenge in the form of an ipGTT, LiCl and leptin treatment reduced the AUC to a  
232 similar extent (~20%), whereas combined application was not more effective (figure 4A, B). Under  
233 artificially-induced hyperglycemia (figure 4C, J), these effects were replicated with acute  
234 treatment with leptin, LiCl or both on day 3 of hyperglycemia resulting in a 10% reduction (LiCl),  
235 and a 15% reduction (leptin and leptin+LiCl) in glucose levels. To test whether the glucose-  
236 lowering effect of leptin was dependent on Wnt pathway activation, we applied PNU74654 two  
237 hours before acute leptin treatment. PNU74654 pretreatment led to a return of glucose levels to  
238 that observed in control conditions (figure 4D,E). PNU74654 alone, on the other hand, led to a  
239 28% increase in AUC (figure 4,DE). During persistent hyperglycemia, Wnt pathway inhibition  
240 with PNU74654 did not significantly aggravate the rise of blood glucose ( $117\pm 5.7$  mg/dl) when  
241 compared with control fish ( $113\pm 4.1$  mg/dl). More importantly however, PNU74654 prevented  
242 the ability of leptin to lower blood glucose levels ( $107\pm 5.3$  mg/dl), compared with leptin-treated  
243 fish ( $97\pm 3.1$  mg/dl; \* $P$ <0.05, repeated measures ANOVA; figure 4F,J). Likewise, the anthelmintic

244 drug pyrvinium pamoate impaired glucose tolerance by 39%, and blocked the glucose-lowering  
245 effect of acute leptin treatment in an ipGTT (figure 4G,H). Under artificially-induced  
246 hyperglycemia, pyrvinium did not significantly aggravate the rise of blood glucose ( $119\pm 6.7$   
247 mg/dl) when compared with control fish ( $113\pm 4.1$  mg/dl), but prevented the ability of leptin to  
248 lower blood glucose levels ( $107\pm 7.9$  mg/dl), compared with leptin-treated fish ( $97\pm 3.1$  mg/dl;  
249  $P < 0.05$ ; figure 4I,J). These findings demonstrate that intact canonical Wnt signalling is required  
250 for the ability of leptin to regulate blood glucose levels.

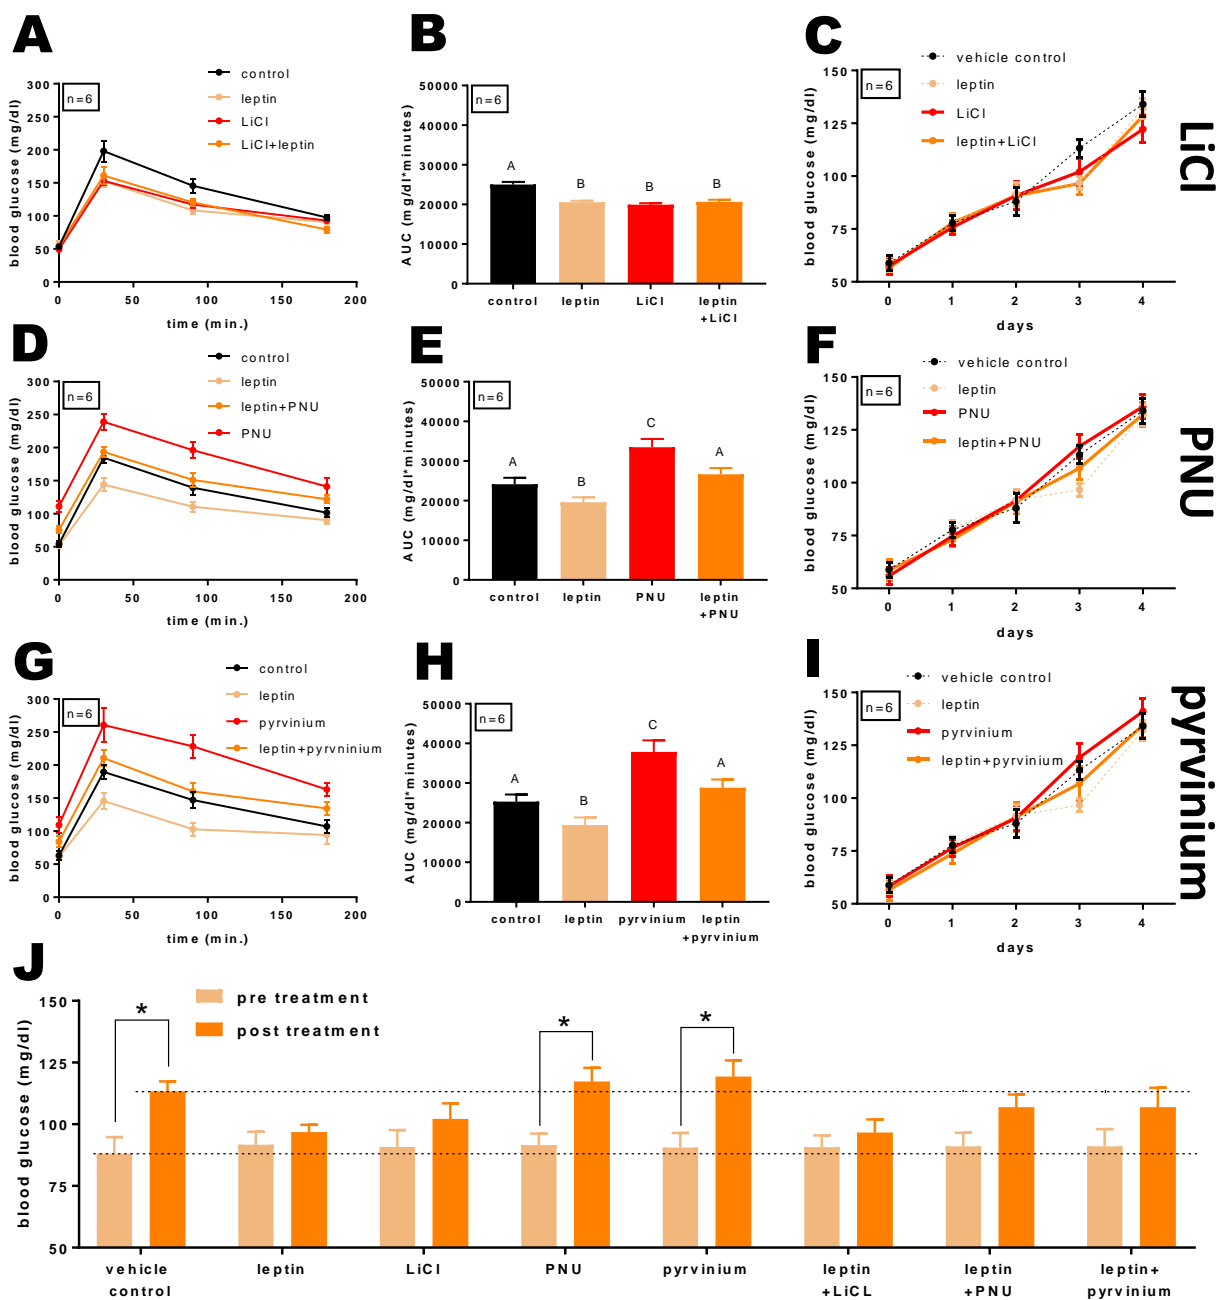

251

252 **Figure 4** Glucose tolerance in wild type zebrafish following WNT pathway manipulation and leptin treatment.

253 (A) Glucose tolerance of adult wild type male zebrafish (n=6). Fish were treated 10 $\mu$ M LiCl (three hours before glucose injection),  
 254 0.6 g/L of recombinant mouse leptin dissolved in Corland salt solution (one hour before glucose injection), vehicle only, or a  
 255 combination of LiCl and leptin. Following 0.5 mg/g glucose injection, blood samples were taken at 30, 90, and 180 minutes post  
 256 injection. (B) Area under the curve of (A). A-B=P<0.05, one-way ANOVA. (C) Blood glucose values of adult wild type male  
 257 zebrafish (n=6) over the course of a 4-day immersion in a 1% glucose solution. On the third day, fish were exposed to 10  $\mu$ M LiCl  
 258 for three hours before daily blood sampling. One hour before blood sampling, fish were injected intraperitoneally with 0.6 g/L of  
 259 recombinant mouse leptin dissolved in Corland salt solution, or with vehicle only. (D) Glucose tolerance of adult wild type male  
 260 zebrafish (n=6). Fish were treated 10  $\mu$ M PNU74654 (three hours before glucose injection), 0.6 g/L of recombinant mouse leptin  
 261 dissolved in Corland salt solution (one hour before glucose injection), vehicle only, or a combination of PNU74654 and leptin.  
 262

263 (E) Area under the curve of (D). A-B and A-C= $P<0.05$ , one-way ANOVA. (F) Blood glucose values of adult wild type male zebrafish  
264 ( $n=6$ ) over the course of a 4-day immersion in a 1% glucose solution with exposure to 10  $\mu\text{M}$  PNU74654. (G) Glucose tolerance  
265 of adult wild type male zebrafish ( $n=6$ ). Fish were treated 10  $\mu\text{M}$  pyrvinium pamoate (three hours before glucose injection), 0.6  
266 g/L of recombinant mouse leptin dissolved in Cortland salt solution (one hour before glucose injection), vehicle only, or a  
267 combination of pyrvinium pamoate and leptin. (H) Area under the curve of (G). A-B and A-C= $P<0.05$ , one-way ANOVA. (I) Blood  
268 glucose values of adult wild type male zebrafish ( $n=6$ ) over the course of a 4-day immersion in a 1% glucose solution with exposure  
269 to 10  $\mu\text{M}$  pyrvinium pamoate. (J) Comparison of blood glucose levels in (C), (F) and (I), pre-treatment (day 2) and post treatment  
270 (day 3). \* $P<0.05$ , repeated measures ANOVA.

271 Conditional deletion of  $\beta$ -catenin in the mediobasal hypothalamus of male mice

272 exacerbates DIO-induced body weight gain, food intake and causes leptin resistance

273 The data in zebrafish clearly showed that leptin activated Wnt signalling and that this was  
274 important for the effect of leptin on glucose homeostasis. Next, we sought to evaluate whether this  
275 mechanism could also be demonstrated in a mammalian model. We used a conditional deletion of  
276  $\beta$ -catenin to ablate canonical Wnt signaling in the mediobasal hypothalamus (MBH). Global  
277 knockout of  $\beta$ -catenin is embryonic lethal [36], and hence, we employed  $\beta$ -catenin<sup>lox</sup> mice and  
278 bilaterally injected AAV2-mCherry-iCre into the mediobasal hypothalamus to ablate  $\beta$ -catenin in  
279 the adult brain ( $\beta$ -catenin KO). We measured body weight and food intake daily following the  
280 introduction of AAV-iCre into the mediobasal hypothalamus until the conclusion of the  
281 experiment, and measured glucose homeostasis using a GTT. There was no significant difference  
282 in body weight or caloric intake between the control- and  $\beta$ -catenin KO mice when mice were fed  
283 low fat (control) diet (LFD) except between days 18-22 when we observed a mild increase in body  
284 weight (figure 5 A,B). However, mice lacking  $\beta$ -catenin in the MBH had markedly impaired  
285 glucose tolerance relative to controls (Figure 5 C, D;  $P<0.05$ ). After 4 weeks fed LFD, both groups  
286 of mice were fed a high fat diet (HFD) for 6 weeks, which led to an increase in body weight  
287 irrespective of genotype.  $\beta$ -catenin KO mice, however, exhibited a much larger increase in body  
288 weight in response to HFD than mice injected with the control virus. This effect became significant  
289 from the 10<sup>th</sup> day of HFD feeding (Figure 5 A,  $P<0.01$ ). By the end of the study the  $\beta$ -catenin KO  
290 mice were 15% heavier than mice that received control injection and were fed HFD ( $P<0.0001$ ).



291 We also observed that during HFD feeding, the  $\beta$ -catenin KO animals had a higher caloric intake  
292 compared with the control mice (Figure 5 B,  $P<0.05$ ). The impaired glucose tolerance induced by  
293 the lack of  $\beta$ -catenin in the MBH persisted after 6 weeks of HFD feeding (Figure 5 C, D;  $P<0.01$ )  
294 relative to controls.

295 We next assessed whether  $\beta$ -catenin deletion affects molecular leptin sensitivity by performing  
296 immunohistochemistry for pSTAT3 in the arcuate nucleus. As expected, acute injection of leptin  
297 (1.25 mg/kg body weight) induced a marked increase in pSTAT3 positive cells in control mice  
298 compared with vehicle-treated mice. In  $\beta$ -catenin mice, however, the response to leptin was fully  
299 ablated ( $P<0.05$ ), suggesting the establishment of resistance to exogenously applied leptin  
300 (Figure 5 E, F;  $P<0.01$  and  $P<0.05$ , respectively).

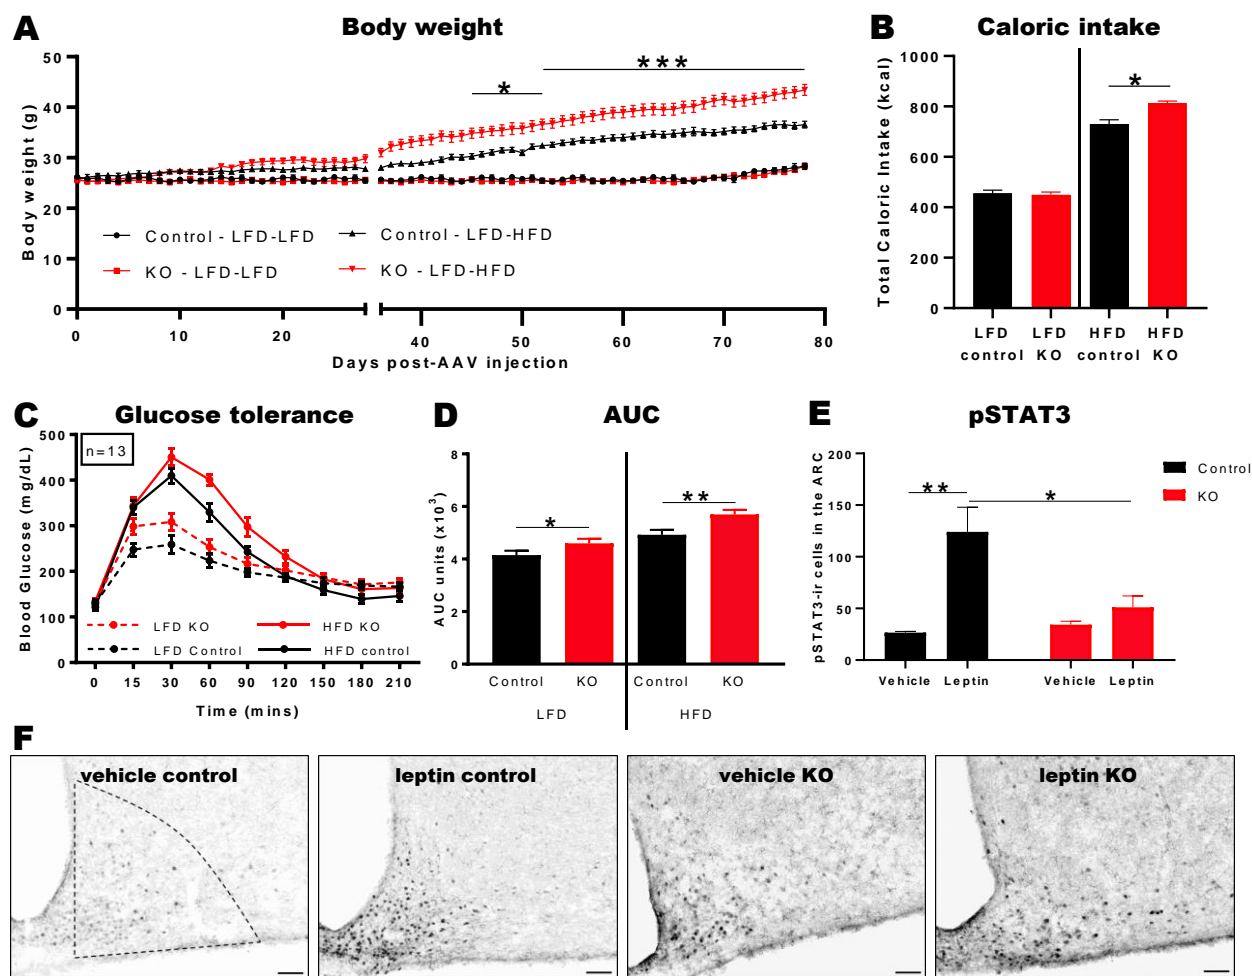

301

302 *Figure 5 Conditional deletion of  $\beta$ -catenin in the mediobasal hypothalamus of male mice exacerbates DIO- induced body*  
 303 *weight gain, food intake and causes leptin resistance.*

304

305 (A) Body weight of male  $\beta$ -catenin<sup>fllox</sup> mice injected with either the control or inducible Cre expressing virus maintained on LFD  
 306 (ad libitum) for 4 weeks followed by 6 weeks on HFD (ad libitum). Also shown are the body weight (g) of  $\beta$ -catenin flox mice  
 307 maintained on LFD throughout the experiment. The bar graphs represent total caloric intake (kcal) of male mice while on LFD  
 308 and HFD. Error bars denote SEM. \*,  $P < 0.05$ ; \*\*\*,  $P < 0.001$ ; KO compared to control mice. (B) Food intake of mice in (A). (C)  
 309 Glucose tolerance of  $\beta$ -catenin KO- and control mice during intraperitoneal glucose tolerance tests. Glucose tolerance tests were  
 310 performed 4 weeks after virus injection but maintained on LFD and 6 weeks after switching to HFD (B,E). (D) Area under the  
 311 curve of (C). Error bars denote SEM. \*,  $P < 0.05$ ; \*\*,  $P < 0.01$ ; KO compared to control mice. (E) Quantified pSTAT3-  
 312 immunoreactive positive cells in the arcuate nucleus after 30 mins of i.p. leptin (1.25 mg/kg) or PBS (vehicle) treatment for the  
 313 different groups. Error bars denote SEM. \*,  $P < 0.05$ ; \*\*,  $P < 0.01$ ; leptin- compared to vehicle-treated mice at each group. (F)  
 314 Representative micrographs of arcuate sections showing pSTAT3 expression following PBS or leptin treatment. Scale bar = 100  
 315  $\mu$ M.

## 316 Discussion

317 In this study we combined visualization of Wnt pathway activation in larval zebrafish brain with  
318 conditional genetic ablation of the Wnt pathway in adult mice to show: 1) Leptin induces activation  
319 of the Wnt pathway in the hypothalamus; 2) this action is dependent on the leptin receptor; 3) that  
320 activation of Wnt is sufficient to mimic leptin action on glucose homeostasis; 4) that leptin action  
321 on glucose homeostasis is impaired following pharmacological blockade of the Wnt pathway.  
322 Collectively, these data support the hypothesis that leptin regulates glucose homeostasis via the  
323 canonical Wnt pathway. These data provide new insights into why genetic polymorphisms in the  
324 Wnt pathway associate with increased risk of type 2 diabetes.

325 While raising zebrafish, we took great care to prevent any tank density effects on body weight,  
326 which have been shown to affect postembryonic development, somatic growth and fat  
327 accumulation [37]. Previous studies on teleost leptin knockout models have yielded contradicting  
328 results, with one study convincingly disproving a role for leptin as an adipostat in the zebrafish  
329 [30], whereas others reported an effect of leptin on adipostasis in zebrafish [38] and medaka [39].  
330 Our data support the original observation [30], but extend this to also characterize a role for leptin  
331 on growth and body weight under conditions of caloric excess.

332 Glucose immersion of zebrafish has previously been shown to readily induce hyperglycemia over  
333 time [35]. We found that blood glucose levels in zebrafish were significantly elevated after two  
334 days of immersion, and that leptin administration on the third day consistently reduced glucose  
335 levels in wild type, *lepa*<sup>nz301</sup> and *lepb*<sup>nz302</sup>, but not in *lepr*<sup>nz303</sup> fish, confirming that the glucose-  
336 lowering properties of leptin are mediated by the leptin receptor. After 3 days of glucose  
337 immersion, blood glucose levels were higher in treated *lepr*<sup>nz303</sup> fish than in *lepa*<sup>nz301</sup> and *lepb*<sup>nz302</sup>

338 as well as wild type fish. The elevated glucose levels in *lepr*<sup>nz303</sup> compared with *lepa*<sup>nz301</sup> and  
339 *lepb*<sup>nz302</sup> fish suggests that the two leptin paralogs are probably functionally redundant for glucose  
340 regulation, and that only leptin receptor knockout is sufficient to induce hyperglycaemia. The fact  
341 that recombinant mouse leptin was active in zebrafish suggests that leptin function is highly  
342 conserved between species. This finding is in line with other studies that previously demonstrated  
343 anorexigenic effects of recombinant leptin in trout [40] and goldfish [41]. Interestingly, both the  
344 rate at which hyperglycemia was induced, and the potency of leptin to reduce hyperglycemia was  
345 identical in male and females. In humans, circulating leptin levels are higher in females [42], and  
346 the brains of female rats are more sensitive to the catabolic actions of ICV injected leptin than  
347 those of age- and weight-matched males [43]. Our data suggest that in the zebrafish, leptin acts  
348 sexually monomorphic.

349 It has been shown that zebrafish become obese when they are exposed to an overfeeding regime,  
350 and they display metabolic alterations similar to DIO mammals, like hypertriglyceridemia, hepatic  
351 steatosis, and systemic inflammation [44]. Under normal feeding conditions, knockout of the leptin  
352 receptor impaired glucose tolerance but had no effect on body weight regulation in the zebrafish,  
353 as neither knockout of leptin-a or leptin-b did. However, this was limited to fish fed normally.  
354 Overfeeding revealed an effect of leptin on body weight and standard length. Under these  
355 conditions *lepr*<sup>nz303</sup> fish had elevated body weight compared with *lepb*<sup>nz302</sup> fish and wild type  
356 zebrafish. Interestingly, *lepa*<sup>nz301</sup> fish too also showed elevated body weight and standard length,  
357 suggesting a specific body weight regulatory and somatic effect of leptin-a that could not be  
358 compensated for by leptin-b. *In silico* binding simulation of zebrafish leptin-a and leptin-b predicts  
359 significantly lower binding energy to the leptin receptor for leptin-b [45]. Previous studies point  
360 towards a role for leptin-b in tissue regeneration rather than energy homeostasis [46, 47]. Further

361 studies are required to delineate potential functional differences in downstream signal transduction  
362 between two leptin paralogues.

363 Overfeeding *per se* led to glucose intolerance in fish independent of genotype, and loss of leptin  
364 function in addition to overfeeding did not impair glucose tolerance further. One recent study  
365 found that overfeeding of zebrafish larvae leads to leptin resistance and reduced hypothalamic  
366 *pomca* levels, leading to activation of the melanocortin system, elevation of growth hormone  
367 levels, and enhanced somatic growth [48]. Together, these data point towards a fundamentally  
368 differential physiological role for leptin depending on nutrient availability. Under normal feeding  
369 conditions, leptin regulates glucose homeostasis. In times of nutrient excess on the other hand,  
370 leptin appears to regulate body weight and somatic growth. From an evolutionary perspective, this  
371 suggests that leptin originated as a glucoregulatory hormone, and that its adipostatic function in  
372 mammals may have been acquired at some point during evolution. Most aquatic species continue  
373 to grow somatically throughout life, whereas growth in terrestrial animals usually reaches a plateau  
374 due to gravity limitations. Because somatic growth limits movement much less in the water than  
375 on land, an adipostatic role of leptin may not be as crucial as in terrestrial species. This is in line  
376 with the recent discovery of the gravitostat in mammals [49]. This system has been suggested to  
377 regulate fat mass in obese mice independently of leptin, whereas leptin-mediated regulation of fat  
378 mass seems to be limited to healthy lean mice [50].

379 The canonical Wnt pathway has been shown to be activated by glucose in pancreatic  $\beta$ -cells,  
380 adipocytes, muscle cells and a macrophage cell line [51]. In mice, we demonstrated that Wnt  
381 signalling in the hypothalamus is impaired during obesity [24]. In the present study, we provide  
382 the first *in vivo* evidence of canonical Wnt pathway activation in the hypothalamus by leptin. Using

383 LiCl as a positive control, we found that leptin-induced Wnt activation was especially prominent  
384 in the hypothalamic region in the brain of zebrafish larvae. Intriguingly, CRISPR-mediated  
385 knockout of the leptin receptor totally abolished this activation, suggesting that leptin activation  
386 of the Wnt pathway is solely mediated by the leptin receptor. Leptin receptor expression in the  
387 zebrafish is found not only in the hypothalamus, but also in a variety of peripheral organs,  
388 including the eye, gut, liver, pancreas, and heart [52]. Another region that showed high intensity  
389 of fluorescence after Wnt activation by LiCl was the heart. However, leptin did not significantly  
390 induce Wnt reporter-driven fluorescence in the heart.

391 Inhibition of the Wnt pathway blocks the ability of leptin to lower blood glucose levels both during  
392 acute and persistent hyperglycemia, suggesting that leptin regulates glucose homeostasis  
393 predominantly via the Wnt pathway. An antidiabetic action upon activation of the Wnt pathway  
394 has been confirmed for LiCl treatment, which has been shown to attenuate non-fasting blood  
395 glucose levels in diabetic  $Lep^{ob/ob}$  BTBR T+ Itpr3tf/J (BTBR) mice [53]. In accordance, LiCl  
396 treatment improves glucose tolerance and normalizes blood glucose levels during a persistent  
397 hyperglycemic challenge in zebrafish. Activation of the Wnt pathway with LiCl improved glucose  
398 homeostasis, even in leptin- or leptin receptor deficient fish, suggesting that LiCl acts  
399 independently of leptin and that leptin acts upstream of the canonical Wnt signalling cascade. We  
400 could previously show that leptin induces phosphorylation of LRP6 in the arcuate nucleus of the  
401 Djungarian hamster (*Phodopus sungorus*) [54].

402 The ability of Wnt signalling to regulate blood glucose levels is often ascribed to GSK3 $\beta$  being a  
403 site of convergence between canonical Wnt- and insulin signalling [55]. In a previous study we  
404 showed that neuron-specific overexpression of GSK3 $\beta$  in the hypothalamus exacerbated the

405 effects of diet-induced obesity in wild type mice compared with mice fed a standard diet, measured  
406 as increased hyperphagia, obesity and glucose intolerance [25]. We also found that  
407 intracerebroventricular injection of a GSK3 $\beta$  inhibitor or the WNT pathway antagonist Dickkopf 1  
408 led to very rapid improvement or deterioration of glucose homeostasis, respectively. Here we  
409 inhibited the Wnt pathway both upstream (using pyrvinium pamoate) and downstream (using  
410 PNU74654) of GSK3 $\beta$ , yet both manipulations impaired glucose tolerance and blocked the  
411 glucoregulatory effect of leptin.

412 From these results it is unclear whether the glucoregulatory action of this pathway depends on  
413 transcriptional targets of the canonical Wnt pathway. Since  $\beta$ -catenin as a transcriptional  
414 coactivator of the pathway is crucial for activation of TCF7/2, we conditionally ablated  $\beta$ -catenin  
415 from the mediobasal hypothalamus in mice. Intriguingly, this treatment replicated the  
416 glucoregulatory effect observed in zebrafish, suggesting that the canonical Wnt pathway in the  
417 brain is a major player in the neuroendocrine regulation of whole body glucose homeostasis across  
418 different vertebrate species. This manipulation led to exogenous leptin resistance, confirming that  
419 leptin action largely depends on functional Wnt signalling in the hypothalamus.

420 Taken together we identify a novel essential role of the central canonical Wnt pathway in the  
421 neuroendocrine control of glucose homeostasis in zebrafish and mice. Furthermore, our findings  
422 highlight that leptin may primarily have evolved as a glucoregulatory hormone with its role of an  
423 adipostat acquired later in evolution. Finally, the glucoregulatory action of leptin is mediated via  
424 the Wnt pathway - an essential mechanism that appears to be conserved throughout the vertebrate  
425 phylum.

## 426 Methods

### 427 Ethics

428 Procedures involving animals were performed in accordance with national animal ethics  
429 legislation and received approval by University of Otago Animal Ethics Committee (AUP-18-  
430 121).

### 431 Zebrafish Husbandry

432 Zebrafish (AB strain) were maintained in 3.5 L tanks on a Palletized Centralized Life Support  
433 System (Tecniplast). The water in this recirculating system was pumped through mechanical  
434 filtration, charcoal filtration, and UV-treatment; and 10% of the water was replaced every hour.  
435 The water was kept at 26–30°C, with pH 7.6–8.0 and a conductivity of 300–600 µS. The facility  
436 environment maintained a 14-hour light and 10-hour dark cycle. Water quality parameters were  
437 automatically measured and adjusted, and remained within acceptable limits for the duration of  
438 the study.

### 439 CRISPR Cas9 mutagenesis

440 Single guide RNAs (sgRNAs) were synthesized *in vitro*. Cas9 mRNA was transcribed from a  
441 pT3TS-nCas9n plasmid (Addgene plasmid #46757). Offspring of AB or  
442 *Tg(7xTCFXla.Siam:nlsMCherry)<sup>ia5</sup>* zebrafish were injected at the one cell stage into the cell with  
443 ~1 nL of a solution containing zebrafish 212.2 ng/µL Cas9 mRNA and 35.4 ng/µL gRNA, based  
444 on [56]. As a positive control, and to test the quality of Cas9mRNA, we used an sgRNA targeting  
445 the tyrosinase gene. Mutagenic efficiency was analyzed using a three-primer fluorescence PCR  
446 method. Biallelic mutant founder fish (F0) were inbred, giving rise to stable mutant offspring.



447 Target sequences were *lepr* GGAGCGCCAGTAAAGCCGTGTGG; *lepa*  
448 GGAATCTCTGGATAATGTCCTGG; *lepb* ACAGAACTGAGACCATCAATGGG; *tyr*  
449 GGACTGGAGGACTTCTGGGG.

#### 450 [Zebrafish Overfeeding](#)

451 3-month-old male leptin mutant fish and wild type control fish were assigned to either a 6-week  
452 overfeeding regime, consisting of 6 daily feeds, or a standard diet of 2 feeds per day. Feeds  
453 alternated between 20 mg/fish of ZM-400© fish pellets, and freshly hatched brine shrimp (*Artemia*  
454 *nauplii*, 30mg cysts/fish). ZM dry pellets (Zebrafish Management Ltd.) consisting of 58% protein,  
455 14.5% fat, 11.5% ash, 7.0% moisture, 30,000 I.U./kg vitamin A, 2,500 I.U./kg vitamin D3, 400  
456 mg/kg vitamin E, 2,000 mg/kg vitamin C, 30 mg/g  $\omega$ 3 highly unsaturated fatty acids. Feeding  
457 times were Zeitgeber Time (ZT) 1:00 (with lights turning on at ZT 0:00), ZT 3:30, ZT 5:00, ZT  
458 7:30, ZT 9:00 and ZT 11:30h under the overfeeding regime, and ZT 3:30 and ZT 7:30 in the normal  
459 fed group. Feeding was done manually, and leftover food was removed by siphoning to prevent an  
460 effect of water quality on body weight [57]. Body weights were measured weekly. Standard length  
461 (SL), defined as the length measured from the tip of the snout to the posterior end of the last  
462 vertebra, was measured at week 0, week 3 and week 6. Finally, glucose tolerance was measured at  
463 the end of the dietary intervention

#### 464 [Zebrafish Compound Exposure](#)

465 Metformin (Sigma) was dissolved in fish water to a final concentration of 20  $\mu$ M. The metformin  
466 solution was freshly prepared and changed daily. PNU74654 (Abcam) and pyrvinium pamoate  
467 (Sigma) were dissolved in DMSO and added to tank water or E3 medium at a final concentration  
468 of 10  $\mu$ M. LiCl (Sigma) was dissolved directly in tank water or E3 medium at a concentration of

469 10  $\mu$ M. *Tg(7xTCF-Xla.Siam:nlsCherry)<sup>ia5</sup>* were treated with 0.003% 1-phenyl-2-thiourea  
470 according to standard protocols to prevent pigmentation.

#### 471 [Zebrafish Blood sampling](#)

472 Borosilicate glass microcapillaries (Harvard Apparatus) were pulled on a Sutter p-97 Flaming  
473 Brown glass micropipette puller to create needles with a 1.0 mm outer diameter. Using scissors,  
474 the needle tips were cut obliquely to create a tip diameter of 100-300 $\mu$ m. Next, needles were  
475 heparinized (5mg/ml heparin in saline) using an aspirator tube assembly. For blood collection, a  
476 heparinized needle was inserted in the nosepiece end of the aspirator tube assembly. Adult  
477 zebrafish were anesthetized with 0.13% tricaine (3-aminobenzoic acid ethyl ether  
478 methanesulfonate, MS222). Anesthetized fish were carefully transferred onto soft tissue paper  
479 soaked in tricaine solution. Another soaked tissue was used to cover the fish's head. The needle  
480 was then carefully inserted at a 30 – 45° angle into the dorsal aorta (DA), along the body axis and  
481 ventral to the spine. Generally, blood would rise into the needle in a pulsatile manner. If blood did  
482 not rise, gentle suction was applied through the mouthpiece, and the needle was moved gently by  
483 hand to encourage blood flow. The minimal required sample volume (0.6  $\mu$ l) was collected. The  
484 needle was immediately removed, and gentle finger pressure with a soaked tissue was applied to  
485 the puncture site for ~15 seconds or until bleeding stopped. Fish were then transferred to a recovery  
486 tank (28.5 °C), and water was gently swirled towards the gills.

#### 487 [Zebrafish Glucose Immersion](#)

488 The glucose immersion method was adapted from Capiotti et al. (2014). Fish were placed in  
489 standard housing tanks containing a 1% glucose solution (55.5 mM). Because the tanks were not

490 on the normal recirculation system, solutions were renewed daily after feeding to prevent growth  
491 of microorganisms. Blood samples were taken daily.

#### 492 [Zebrafish Intraperitoneal glucose tolerance tests](#)

493 Fish were fasted for 72 hours to bring glucose levels down to baseline. Following anesthesia, fish  
494 were weighed and injected intraperitoneally with 0.5 mg glucose/g fish weight and allowed to  
495 recover for 30, 90, and 180 min after injection. Glucose concentrations were measured using a  
496 commercially available glucometer (Accu-Chek Performa; Roche)

#### 497 [Mice](#)

498 Mice containing lox-P sites in introns 1&6 of  $\beta$ -catenin ( $\beta$ -catenin<sup>flox</sup>; B6.129-  
499 Ctnnb1<sup>tm2Kem/KnwJ</sup>, Jackson labs; b-catenin gene is flanked by LoxP sites (floxed)) (8 weeks  
500 old; n=16-20 per group) were obtained from the University of Otago animal breeding facility. They  
501 were individually housed under 12:12h light/dark cycle (lights on 0600h) at a constant temperature  
502 (21 + 1 °C) with ad libitum access to food and water, except during fasting when only water was  
503 available. Mice were fed either a low-fat diet (LFD; D12450B Research Diets, New Brunswick,  
504 NJ 08901 USA) with 10% fat by energy (kcal) or high-fat diet (HFD; D12492 Research Diets)  
505 with 60% fat by energy (kcal). When required, in female mice the estrous cycle was determined  
506 by cytological examination of vaginal smears. This was done to ensure females were in diestrus  
507 when collecting tissue samples.

#### 508 [Stereotaxic injections](#)

509 Both adult male and female  $\beta$ -catenin<sup>flox</sup> mice were used. Intrahypothalamic injections were  
510 performed under isoflurane anaesthesia as described previously (23). Stereotaxic co-ordinates to

511 reach the arcuate nucleus were 0.125mm posterior,  $\pm$ 0.35mm lateral and 0.59mm ventral relative  
512 to Bregma. An AAV-vector expressing Cre recombinase (AAV2-mCherry-iCre AAV virus, Penn  
513 Vector Core) was injected bilaterally using 1 mL Hamilton Syringes (Model 7001 KH SYR,  
514 80100, Hamilton Company, Nevada 89502, USA) at volume of 0.5 mL at either side of the arcuate  
515 nucleus (Figure 1A). The injection needle was lowered to the correct coordinates over a period of  
516 5 min, paused for 2 min, and then the virus was injected over a period of 2 min. The injection  
517 needle remained in place at each injection site for an additional 10 min to allow for diffusion and  
518 prevent backflow. The incision was then sutured and the mice were placed under a heating lamp  
519 in their home cage for recovery. The expectation was that viral-induced expression of the Cre  
520 would excise the floxed  $\beta$ -catenin gene resulting in a localized deletion of  $\beta$ -catenin at the site of  
521 injection. For control experiments,  $\beta$ -catenin<sup>fl</sup> mice were injected with an AAV-vector that did  
522 not express the Cre recombinase (AAV/DJ-CMV-mCherry AAV virus). For both knockout (KO)  
523 and control experiments, mice were body weight matched and placed in respective groups (control  
524 male mice, KO male mice; control female mice and KO female mice).

#### 525 [Onset of obesity, food intake, metabolic measurement and glucose tolerance tests](#)

526 Following the injection of the AAV-vector, mice were fed LFD for four weeks. Mice were fasted  
527 for 16 h, and at zeitgeber time (ZT) 0 (to guarantee a consistent influence of the circadian rhythm),  
528 they were injected intraperitoneally (ip) with glucose (1.5 g/kg), and a glucose tolerance test was  
529 performed. To determine the blood glucose levels, drops of blood from tail tips were collected  
530 repeatedly and glucose concentrations (mg/dL) were measured using a commercially available  
531 glucometer (Accu-Check Performa, Roche, Basel, Switzerland). For statistical validation, the area  
532 under the curve (AUC) was calculated.

533 We next investigated the effect of HFD on these mice. They were then fasted for 16 h and an  
534 ipGTT was performed as described above. Throughout the whole procedure, from viral injection  
535 till the conclusion of the study, daily body weight and food intake measurements were recorded.  
536 In addition, another cohort of mice was placed through a similar regime as above, but was fed LFD  
537 throughout the experiment.

#### 538 Immunohistochemistry – Validation of AAV-vector injections

539 To validate successful deletion of  $\beta$ -catenin in the arcuate nucleus, in another set of brain sections,  
540 immunohistochemical analysis of  $\beta$ -catenin (6B3; Rabbit mAb #9582; 1:100; Cell Signalling) was  
541 performed as per the manufacturers protocol. Images of the arcuate nucleus were taken, and  
542 presence or absence of  $\beta$ -catenin was analysed within that region.

#### 543 Immunohistochemistry – Onset of leptin resistance

544 To determine the onset of either leptin or insulin resistance in mice with  $\beta$ -catenin knocked out in  
545  $\beta$ -catenin expressing cells specifically in the ARC, mice were body weight-matched and further  
546 subdivided into either vehicle- or leptin-or insulin-treated mice. At the conclusion of the study,  
547 mice were fasted for 16 h to reduce endogenous levels of either leptin or insulin, and at ZT0, were  
548 injected ip with either 0.1M PBS (vehicle), leptin (1.25 mg/kg; R&D Systems, Minneapolis, MN  
549 55413 USA) or insulin (1 mg/kg; I6634; Sigma-Aldrich). Thirty mins (leptin-treatment) or 15 mins  
550 (insulin-treatment) post-injection, mice were anaesthetised (with Pentobarbitol; 30 mg/kg), and  
551 once the pedal withdrawal reflex was lost, were transcardially perfused with 0.9% heparinized  
552 saline followed by 4% paraformaldehyde in 0.1M phosphate buffer (pH 7.4). The procedure has  
553 been described in detail elsewhere (25).

554 The immunohistochemical analysis of phosphorylated signal transducer and activator of  
555 transcription3 (pSTAT3; Tyr705; Rabbit mAb #9145; 1:3000; Cell Signalling, Danvers, MA  
556 01923, USA), a marker for leptin receptor signalling (25) or of phosphorylated Akt (Protein Kinase  
557 B) (pAkt; Ser 473; Rabbit mAb #4060; 1:500; Cell Signalling), a marker for insulin receptor  
558 signalling (26) was performed on 30  $\mu$ m coronal brain sections in accordance with a previously  
559 described protocol for leptin (27) or insulin (26). pSTAT3 or pAkt positive immunoreactive cells  
560 were examined using an Olympus AX70 Provis light microscope (Olympus, Tokyo, Japan).  
561 Images of the arcuate nucleus were taken using the Spot RT Colour Camera attached to the  
562 microscope with an identical setting throughout the analysis. Two investigators who were blinded  
563 to the treatment counted immunoreactive cells within one of the bilateral halves of the arcuate  
564 nucleus (n=4-5 sections per mouse).

### 565 [Statistics](#)

566 Data were analysed by one- or two-way ANOVA with repeated measurements tests, where  
567 appropriate followed by a Holm-Sidak post-hoc test to check for significance, as appropriate using  
568 Prism software. Results are presented as the mean + SEM.  $P < 0.05$  was considered statistically  
569 significant. For metabolic measurements, analysis of covariance (ANCOVA) for two independent  
570 samples was performed, whereby the body weight was used as the concomitant variable whose  
571 effects were brought under statistical control, and the energy expenditure was the dependent  
572 variable of interest.  $P < 0.05$  was considered statistically significant.

### 573 [Acknowledgements](#)

574 This work was supported by the Royal Society of New Zealand Marsden Fund to AT, the  
575 Maurice Wilkins Centre (to A.T. and D.G) and the Health Research Council of New Zealand (to  
576 D.G.).

577 [Declarations of interest:](#)

578 none

579

## 580 Citations

- 581 1. Pellemounter MA, Cullen MJ, Baker MB, Hecht R, Winters D, Boone T, et al. Effects of the obese  
582 gene product on body weight regulation in ob/ob mice. *Science (New York, NY)*. 1995;269(5223):540-3.
- 583 2. Muzzin P, Eisensmith RC, Copeland KC, Woo SL. Correction of obesity and diabetes in genetically  
584 obese mice by leptin gene therapy. *Proceedings of the National Academy of Sciences of the United*  
585 *States of America*. 1996;93(25):14804-8.
- 586 3. Schwartz MW, Baskin DG, Bukowski TR, Kuijper JL, Foster D, Lasser G, et al. Specificity of leptin  
587 action on elevated blood glucose levels and hypothalamic neuropeptide Y gene expression in ob/ob  
588 mice. *Diabetes*. 1996;45(4):531-5.
- 589 4. Farooqi IS, Jebb SA, Langmack G, Lawrence E, Cheetham CH, Prentice AM, et al. Effects of  
590 recombinant leptin therapy in a child with congenital leptin deficiency. *The New England journal of*  
591 *medicine*. 1999;341(12):879-84.
- 592 5. Yu X, Park BH, Wang MY, Wang ZV, Unger RH. Making insulin-deficient type 1 diabetic rodents  
593 thrive without insulin. *Proceedings of the National Academy of Sciences of the United States of America*.  
594 2008;105(37):14070-5.
- 595 6. Hedbacker K, Birsoy K, Wysocki RW, Asilmaz E, Ahima RS, Farooqi IS, et al. Antidiabetic effects of  
596 IGFBP2, a leptin-regulated gene. *Cell metabolism*. 2010;11(1):11-22.
- 597 7. Koch C, Augustine RA, Steger J, Ganjam GK, Benzler J, Pracht C, et al. Leptin rapidly improves  
598 glucose homeostasis in obese mice by increasing hypothalamic insulin sensitivity. *The Journal of*  
599 *neuroscience : the official journal of the Society for Neuroscience*. 2010;30(48):16180-7.
- 600 8. Genuth SM, Przybylski RJ, Rosenberg DM. Insulin resistance in genetically obese, hyperglycemic  
601 mice. *Endocrinology*. 1971;88(5):1230-8.
- 602 9. Oral EA, Simha V, Ruiz E, Andewelt A, Premkumar A, Snell P, et al. Leptin-replacement therapy  
603 for lipodystrophy. *The New England journal of medicine*. 2002;346(8):570-8.
- 604 10. Shimomura I, Hammer RE, Ikemoto S, Brown MS, Goldstein JL. Leptin reverses insulin resistance  
605 and diabetes mellitus in mice with congenital lipodystrophy. *Nature*. 1999;401(6748):73-6.
- 606 11. Wang MY, Chen L, Clark GO, Lee Y, Stevens RD, Ilkayeva OR, et al. Leptin therapy in insulin-  
607 deficient type I diabetes. *Proceedings of the National Academy of Sciences of the United States of*  
608 *America*. 2010;107(11):4813-9.
- 609 12. Hübschle T, Thom E, Watson A, Roth J, Klaus S, Meyerhof W. Leptin-induced nuclear  
610 translocation of STAT3 immunoreactivity in hypothalamic nuclei involved in body weight regulation. *The*  
611 *Journal of neuroscience : the official journal of the Society for Neuroscience*. 2001;21(7):2413-24.
- 612 13. Rizk NM, Stammsen D, Preibisch G, Eckel J. Leptin and tumor necrosis factor-alpha induce the  
613 tyrosine phosphorylation of signal transducer and activator of transcription proteins in the  
614 hypothalamus of normal rats in vivo. *Endocrinology*. 2001;142(7):3027-32.
- 615 14. Bjørbaek C, El-Haschimi K, Frantz JD, Flier JS. The role of SOCS-3 in leptin signaling and leptin  
616 resistance. *The Journal of biological chemistry*. 1999;274(42):30059-65.
- 617 15. Münzberg H, Flier JS, Bjørbaek C. Region-specific leptin resistance within the hypothalamus of  
618 diet-induced obese mice. *Endocrinology*. 2004;145(11):4880-9.



- 619 16. Morton GJ, Gelling RW, Niswender KD, Morrison CD, Rhodes CJ, Schwartz MW. Leptin regulates  
620 insulin sensitivity via phosphatidylinositol-3-OH kinase signaling in mediobasal hypothalamic neurons.  
621 *Cell metabolism*. 2005;2(6):411-20.
- 622 17. Bates SH, Kulkarni RN, Seifert M, Myers MG, Jr. Roles for leptin receptor/STAT3-dependent and -  
623 independent signals in the regulation of glucose homeostasis. *Cell metabolism*. 2005;1(3):169-78.
- 624 18. Take K, Waki H, Sun W, Wada T, Yu J, Nakamura M, et al. CDK5 Regulatory Subunit-Associated  
625 Protein 1-like 1 Negatively Regulates Adipocyte Differentiation through Activation of Wnt Signaling  
626 Pathway. *Scientific reports*. 2017;7(1):7326.
- 627 19. Mishra BK, Banerjee BD, Agrawal V, Madhu SV. Association of PPAR $\gamma$  gene expression with  
628 postprandial hypertriglyceridaemia and risk of type 2 diabetes mellitus. *Endocrine*. 2020;68(3):549-56.
- 629 20. Loh NY, Minchin JEN, Pinnick KE, Verma M, Todorčević M, Denton N, et al. RSPO3 impacts body  
630 fat distribution and regulates adipose cell biology in vitro. *Nature communications*. 2020;11(1):2797.
- 631 21. Grant SF, Thorleifsson G, Reynisdottir I, Benediktsson R, Manolescu A, Sainz J, et al. Variant of  
632 transcription factor 7-like 2 (TCF7L2) gene confers risk of type 2 diabetes. *Nature genetics*.  
633 2006;38(3):320-3.
- 634 22. Dale TC. Signal transduction by the Wnt family of ligands. *The Biochemical journal*. 1998;329 ( Pt  
635 2):209-23.
- 636 23. Clevers H, Nusse R. Wnt/ $\beta$ -catenin signaling and disease. *Cell*. 2012;149(6):1192-205.
- 637 24. Benzler J, Andrews ZB, Pracht C, Stohr S, Shepherd PR, Grattan DR, et al. Hypothalamic WNT  
638 signalling is impaired during obesity and reinstated by leptin treatment in male mice. *Endocrinology*.  
639 2013;154(12):4737-45.
- 640 25. Benzler J, Ganjam GK, Kruger M, Pinkenburg O, Kutschke M, Stohr S, et al. Hypothalamic  
641 glycogen synthase kinase 3beta has a central role in the regulation of food intake and glucose  
642 metabolism. *The Biochemical journal*. 2012;447(1):175-84.
- 643 26. Rajan A, Perrimon N. *Drosophila* cytokine unpaired 2 regulates physiological homeostasis by  
644 remotely controlling insulin secretion. *Cell*. 2012;151(1):123-37.
- 645 27. Denver RJ, Bonett RM, Boorse GC. Evolution of leptin structure and function.  
646 *Neuroendocrinology*. 2011;94(1):21-38.
- 647 28. Gorissen M, Bernier NJ, Nabuurs SB, Flik G, Huising MO. Two divergent leptin paralogues in  
648 zebrafish (*Danio rerio*) that originate early in teleostean evolution. *The Journal of endocrinology*.  
649 2009;201(3):329-39.
- 650 29. Londraville RL, Prokop JW, Duff RJ, Liu Q, Tuttle M. On the Molecular Evolution of Leptin, Leptin  
651 Receptor, and Endospanin. *Frontiers in endocrinology*. 2017;8:58.
- 652 30. Michel M, Page-McCaw PS, Chen W, Cone RD. Leptin signaling regulates glucose homeostasis,  
653 but not adipostasis, in the zebrafish. *Proceedings of the National Academy of Sciences of the United  
654 States of America*. 2016;113(11):3084-9.
- 655 31. Moro E, Ozhan-Kizil G, Mongera A, Beis D, Wierzbicki C, Young RM, et al. In vivo Wnt signaling  
656 tracing through a transgenic biosensor fish reveals novel activity domains. *Developmental biology*.  
657 2012;366(2):327-40.
- 658 32. Klein PS, Melton DA. A molecular mechanism for the effect of lithium on development.  
659 *Proceedings of the National Academy of Sciences of the United States of America*. 1996;93(16):8455-9.

- 660 33. Thorne CA, Hanson AJ, Schneider J, Tahinci E, Orton D, Cselenyi CS, et al. Small-molecule  
661 inhibition of Wnt signaling through activation of casein kinase 1 $\alpha$ . *Nature chemical biology*.  
662 2010;6(11):829-36.
- 663 34. Trosset JY, Dalvit C, Knapp S, Fasolini M, Veronesi M, Mantegani S, et al. Inhibition of protein-  
664 protein interactions: the discovery of druglike beta-catenin inhibitors by combining virtual and  
665 biophysical screening. *Proteins*. 2006;64(1):60-7.
- 666 35. Gleeson M, Connaughton V, Arneson LS. Induction of hyperglycaemia in zebrafish (*Danio rerio*)  
667 leads to morphological changes in the retina. *Acta diabetologica*. 2007;44(3):157-63.
- 668 36. Brault V, Moore R, Kutsch S, Ishibashi M, Rowitch DH, McMahon AP, et al. Inactivation of the  
669 beta-catenin gene by Wnt1-Cre-mediated deletion results in dramatic brain malformation and failure of  
670 craniofacial development. *Development (Cambridge, England)*. 2001;128(8):1253-64.
- 671 37. Leibold S, Hammerschmidt M. Long-term hyperphagia and caloric restriction caused by low- or  
672 high-density husbandry have differential effects on zebrafish postembryonic development, somatic  
673 growth, fat accumulation and reproduction. *PLoS one*. 2015;10(3):e0120776.
- 674 38. Audira G, Sarasamma S, Chen JR, Juniardi S, Sampurna BP, Liang ST, et al. Zebrafish Mutants  
675 Carrying Leptin a (*lepa*) Gene Deficiency Display Obesity, Anxiety, Less Aggression and Fear, and  
676 Circadian Rhythm and Color Preference Dysregulation. *International journal of molecular sciences*.  
677 2018;19(12).
- 678 39. Chisada SI, Kurokawa T, Murashita K, Ronnestad I, Taniguchi Y, Toyoda A, et al. Leptin receptor-  
679 deficient (knockout) medaka, *Oryzias latipes*, show chronic up-regulated levels of orexigenic  
680 neuropeptides, elevated food intake and stage specific effects on growth and fat allocation. *General and*  
681 *comparative endocrinology*. 2013.
- 682 40. Aguilar AJ, Conde-Sieira M, Polakof S, Miguez JM, Soengas JL. Central leptin treatment  
683 modulates brain glucosensing function and peripheral energy metabolism of rainbow trout. *Peptides*.  
684 2010;31(6):1044-54.
- 685 41. de Pedro N, Martinez-Alvarez R, Delgado MJ. Acute and chronic leptin reduces food intake and  
686 body weight in goldfish (*Carassius auratus*). *The Journal of endocrinology*. 2006;188(3):513-20.
- 687 42. Considine RV, Sinha MK, Heiman ML, Kriauciunas A, Stephens TW, Nyce MR, et al. Serum  
688 immunoreactive-leptin concentrations in normal-weight and obese humans. *The New England journal of*  
689 *medicine*. 1996;334(5):292-5.
- 690 43. Clegg DJ, Riedy CA, Smith KA, Benoit SC, Woods SC. Differential sensitivity to central leptin and  
691 insulin in male and female rats. *Diabetes*. 2003;52(3):682-7.
- 692 44. Oka T, Nishimura Y, Zang L, Hirano M, Shimada Y, Wang Z, et al. Diet-induced obesity in  
693 zebrafish shares common pathophysiological pathways with mammalian obesity. *BMC physiology*.  
694 2010;10:21.
- 695 45. Prokop JW, Duff RJ, Ball HC, Copeland DL, Londraville RL. Leptin and leptin receptor: analysis of a  
696 structure to function relationship in interaction and evolution from humans to fish. *Peptides*.  
697 2012;38(2):326-36.
- 698 46. Kang J, Hu J, Karra R, Dickson AL, Tornini VA, Nachtrab G, et al. Modulation of tissue repair by  
699 regeneration enhancer elements. *Nature*. 2016;532(7598):201-6.
- 700 47. Sifuentes CJ, Kim JW, Swaroop A, Raymond PA. Rapid, Dynamic Activation of Müller Glial Stem  
701 Cell Responses in Zebrafish. *Investigative ophthalmology & visual science*. 2016;57(13):5148-60.

- 702 48. Lohr H, Hess S, Pereira MMA, Reinoss P, Leibold S, Schenkel C, et al. Diet-Induced Growth Is  
703 Regulated via Acquired Leptin Resistance and Engages a Pomc-Somatostatin-Growth Hormone Circuit.  
704 Cell reports. 2018;23(6):1728-41.
- 705 49. Jansson JO, Palsdottir V, Hagg DA, Schele E, Dickson SL, Anesten F, et al. Body weight homeostat  
706 that regulates fat mass independently of leptin in rats and mice. Proceedings of the National Academy of  
707 Sciences of the United States of America. 2018;115(2):427-32.
- 708 50. Ohlsson C, Hagg DA, Hammarhjelm F, Dalmau Gasull A, Bellman J, Windahl SH, et al. The  
709 Gravitostat Regulates Fat Mass in Obese Male Mice While Leptin Regulates Fat Mass in Lean Male Mice.  
710 Endocrinology. 2018;159(7):2676-82.
- 711 51. Dissanayake WC, Sorrenson B, Shepherd PR. The role of adherens junction proteins in the  
712 regulation of insulin secretion. Bioscience reports. 2018;38(2).
- 713 52. Liu Q, Chen Y, Copeland D, Ball H, Duff RJ, Rockich B, et al. Expression of leptin receptor gene in  
714 developing and adult zebrafish. General and comparative endocrinology. 2010;166(2):346-55.
- 715 53. de Groot T, Damen L, Kosse L, Alsady M, Doty R, Baumgarten R, et al. Lithium reduces blood  
716 glucose levels, but aggravates albuminuria in BTBR-ob/ob mice. PloS one. 2017;12(12):e0189485.
- 717 54. Boucsein A, Benzler J, Hempp C, Stohr S, Helfer G, Tups A. Photoperiodic and Diurnal Regulation  
718 of WNT Signaling in the Arcuate Nucleus of the Female Djungarian Hamster, *Phodopus sungorus*.  
719 Endocrinology. 2016;157(2):799-809.
- 720 55. Helfer G, Tups A. Hypothalamic Wnt Signalling and its Role in Energy Balance Regulation. Journal  
721 of neuroendocrinology. 2016;28(3):12368.
- 722 56. Varshney GK, Carrington B, Pei W, Bishop K, Chen Z, Fan C, et al. A high-throughput functional  
723 genomics workflow based on CRISPR/Cas9-mediated targeted mutagenesis in zebrafish. Nature  
724 protocols. 2016;11(12):2357-75.
- 725 57. Meriac A, Eding EH, Schrama J, Kamstra A, Verreth JAJ. Dietary carbohydrate composition can  
726 change waste production and biofilter load in recirculating aquaculture systems. Aquaculture. 2014;420-  
727 421:254-61.

728

729 Supplemental figures

| <b>Leptin-a KO (<i>lepa<sup>nz301</sup></i>)</b> |                         |
|--------------------------------------------------|-------------------------|
| Target Sequence                                  | GGAATCTCGGATAATGCTCTGG  |
| Genomic Location                                 | chr18:10690042          |
| Strand                                           | Sense                   |
| GC Content                                       | 45%                     |
| Left Primer                                      | ATCATCGTCAGAATCAGGGAAC  |
| Left Primer Coordinates                          | chr18:10689883-10689905 |
| Right Primer                                     | TCTGGTCAACATGCTTATTGG   |
| Right Primer Coordinates                         | chr18:10690141-10690163 |
| Amplicon Size                                    | 301                     |

| <b>Leptin-b KO (<i>lepb<sup>nz302</sup></i>)</b> |                         |
|--------------------------------------------------|-------------------------|
| Target Sequence                                  | GGAACCTCTGGAGCTCCAGGAGG |
| Genomic Location                                 | chr4:19031954           |
| Strand                                           | Sense                   |
| GC Content                                       | 65%                     |
| Left Primer                                      | GGTGCATAAAGAAAGAACAGCC  |
| Left Primer Coordinates                          | chr4:19032003-19032025  |
| Right Primer                                     | GCATGGCTTACACATTTACAGAG |
| Right Primer Coordinates                         | chr4:19031861-19031883  |
| Amplicon Size                                    | 182                     |

| <b>Leptin receptor KO (<i>lepr<sup>nz303</sup></i>)</b> |                                   |
|---------------------------------------------------------|-----------------------------------|
| Target Sequence                                         | GGAGCGCCAGTAAAGCCGTGTGG           |
| Genomic Location                                        | chr6_KZ115187v1_alt:385269        |
| Strand                                                  | Antisense                         |
| GC Content                                              | 65%                               |
| Left Primer                                             | ggcttaaatggccctctattct            |
| Left Primer Coordinates                                 | chr6_KZ115187v1_alt:385386-385408 |
| Right Primer                                            | TGACCTGCTCATTGATGACTCT            |
| Right Primer Coordinates                                | chr6_KZ115187v1_alt:385208-385230 |
| Amplicon Size                                           | 214                               |

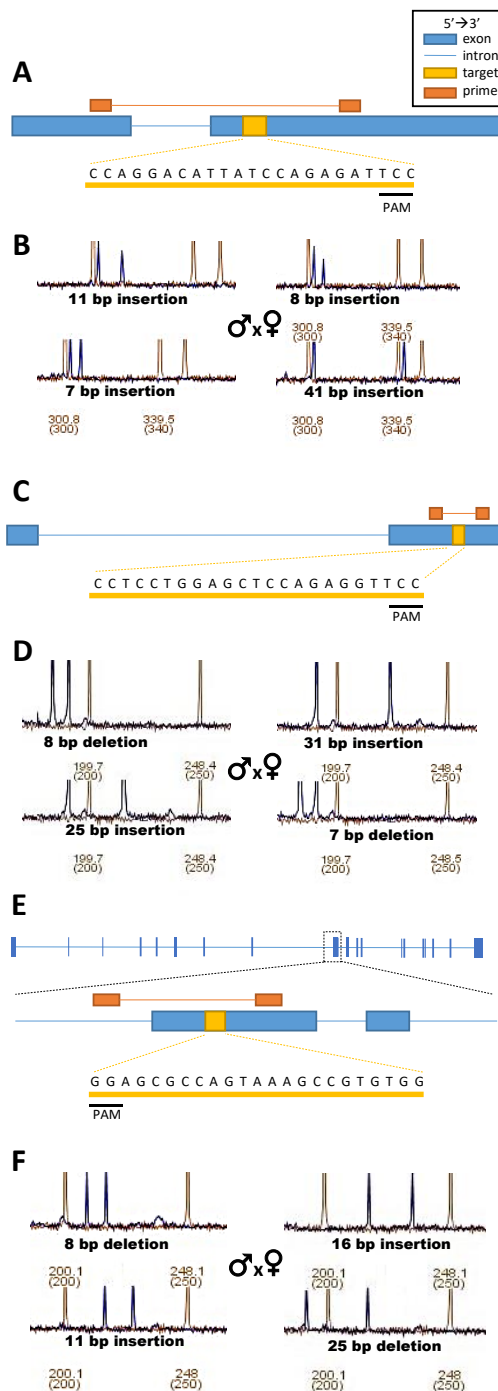

730

731 **Figure S1** Creation of *lepa<sup>301</sup>*, *lepb<sup>302</sup>*, *lepr<sup>303</sup>* mutant zebrafish lines. (A) Zebrafish *leptin-a* gene with target sequence and primers.  
 732 (B) Fluorescence PCR plots of selected *lepa<sup>301</sup>* founder fish with annotated insertion/deletion. (C) Zebrafish *leptin-b* gene with  
 733 target sequence and primers. (D) Fluorescence PCR plots of selected *lepb<sup>302</sup>* founder fish with annotated insertion/deletion. (E)  
 734 Zebrafish *leptin receptor* gene with target sequence and primers. (F) Fluorescence PCR plots of selected *lepr<sup>303</sup>* founder fish with  
 735 annotated insertion/deletion.

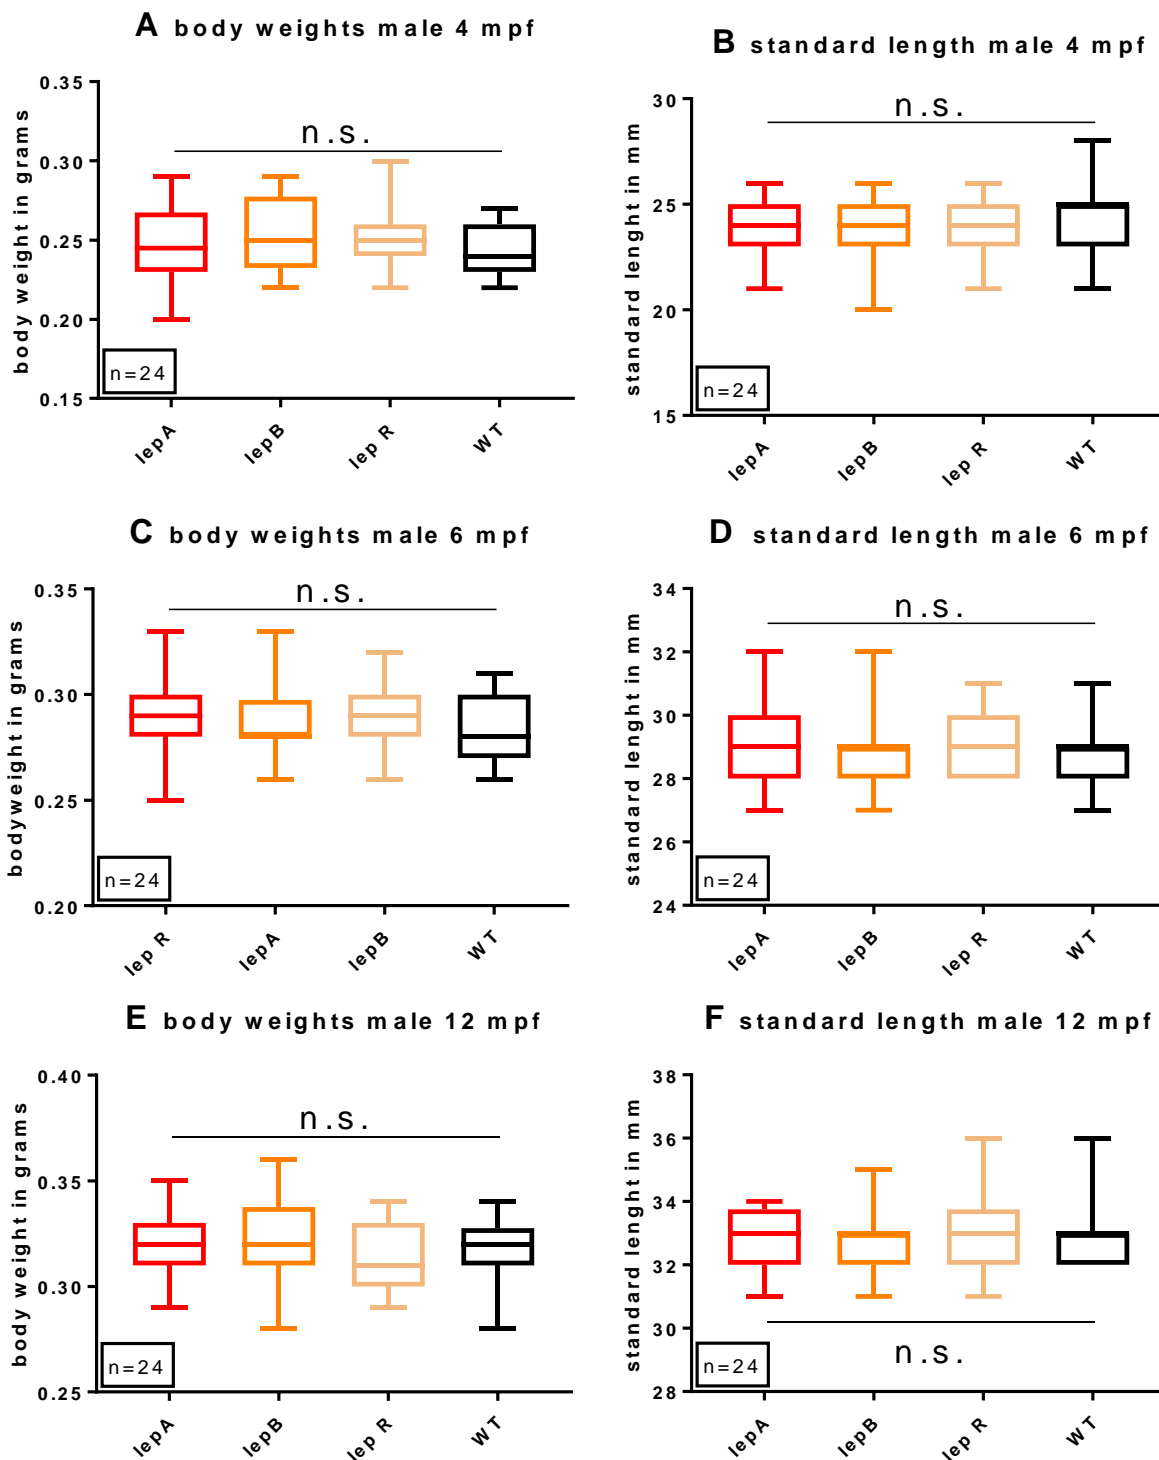

736

737 *Figure S2 Leptin has no effect on male body weight or body length in the zebrafish.*

738 *lep<sup>n:301</sup> fish, lep<sup>n:302</sup> fish, lep<sup>n:303</sup> fish and wild type controls (n=24) were raised at identical tank densities. Body weight was*  
739 *measured at 4 months' post fertilization (A), 6 months post fertilization (C) and 12 months post fertilization (E). Standard length*  
740 *was measured simultaneously (B, D, F). No significant differences were found between any groups at any stage, as measured using*  
741 *one-way ANOVAs. lepA= lep<sup>n:301</sup> fish; lepB= lep<sup>n:302</sup> fish; lepR= lep<sup>n:303</sup> fish; WT=wild type control; data displayed as boxplots*  
742 *with whiskers representing minimum and maximum values.*

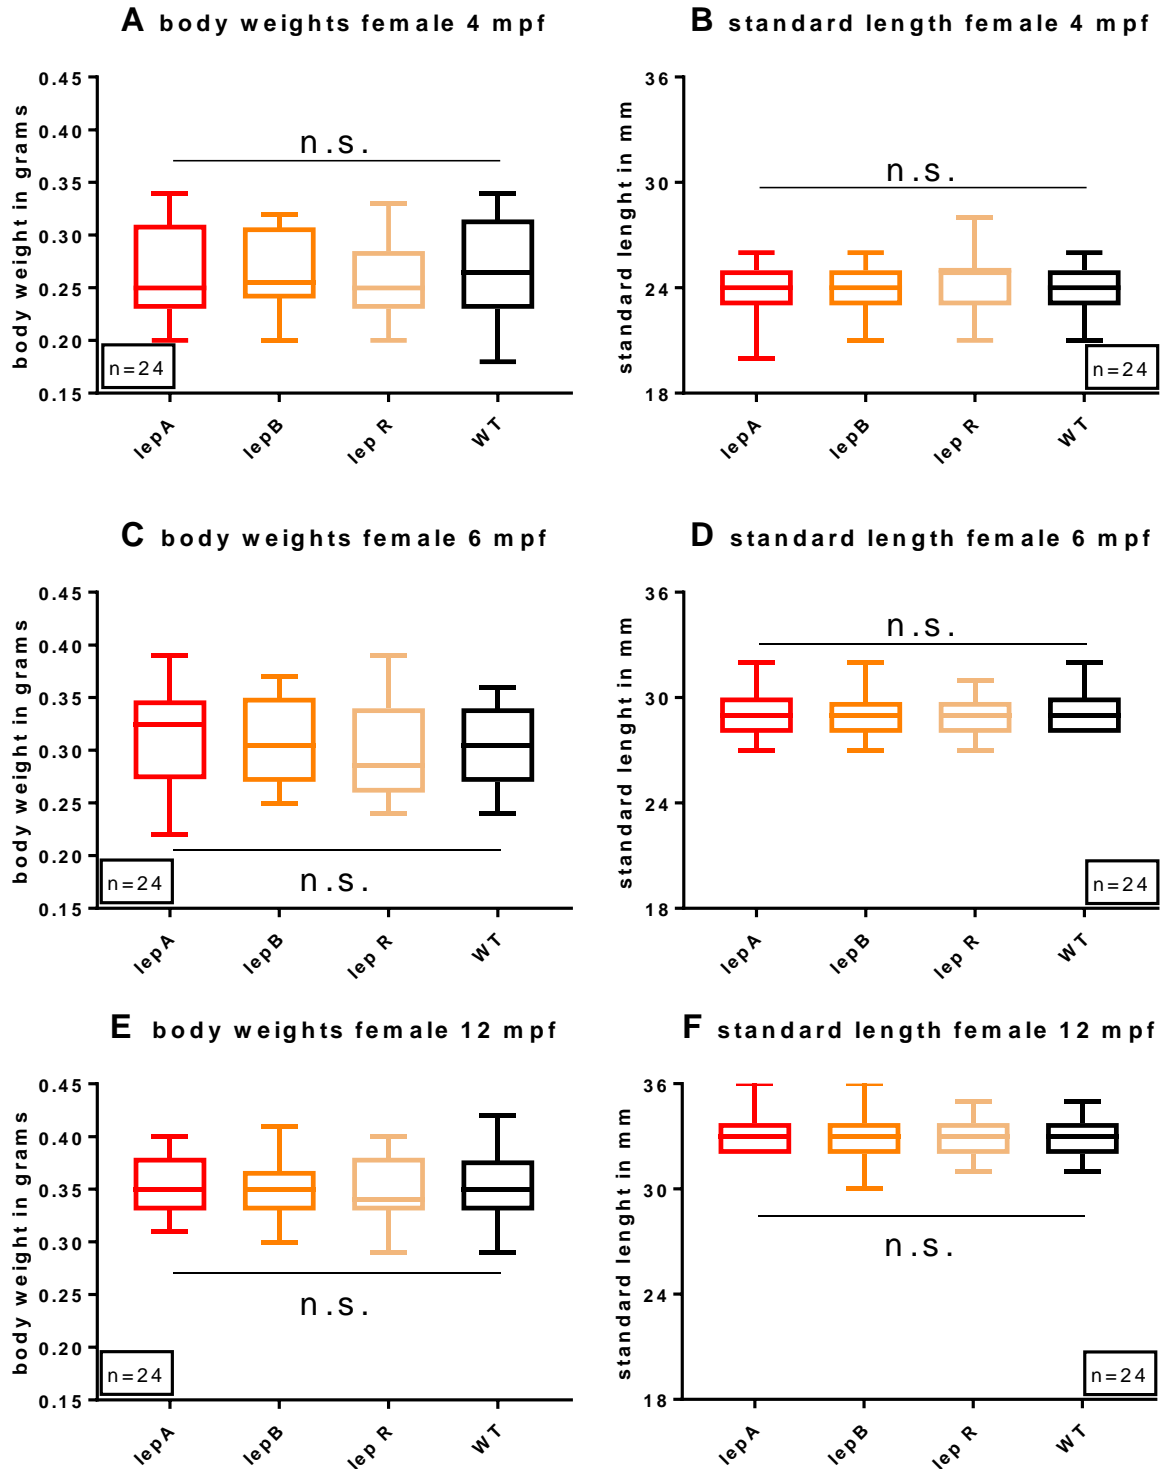

743

744

*Figure S3 Leptin has no effect on female body weight or body length in the zebrafish.*

745

746

747

748

749

*lep<sup>nz301</sup> fish, lep<sup>nz302</sup> fish, lep<sup>nz303</sup> fish and wild type controls (n=24) were raised at identical tank densities. Body weight was measured at 4 months post fertilization (A), 6 months post fertilization (C) and 12 months post fertilization (E). Standard length was measured simultaneously (B, D, F). No significant differences were found between any groups at any stage, as measured using one-way ANOVAs. lepA= lep<sup>nz301</sup> fish; lepB= lep<sup>nz302</sup> fish; lepR= lep<sup>nz303</sup> fish; WT=wild type control; data displayed as boxplots with whiskers representing minimum and maximum values.*

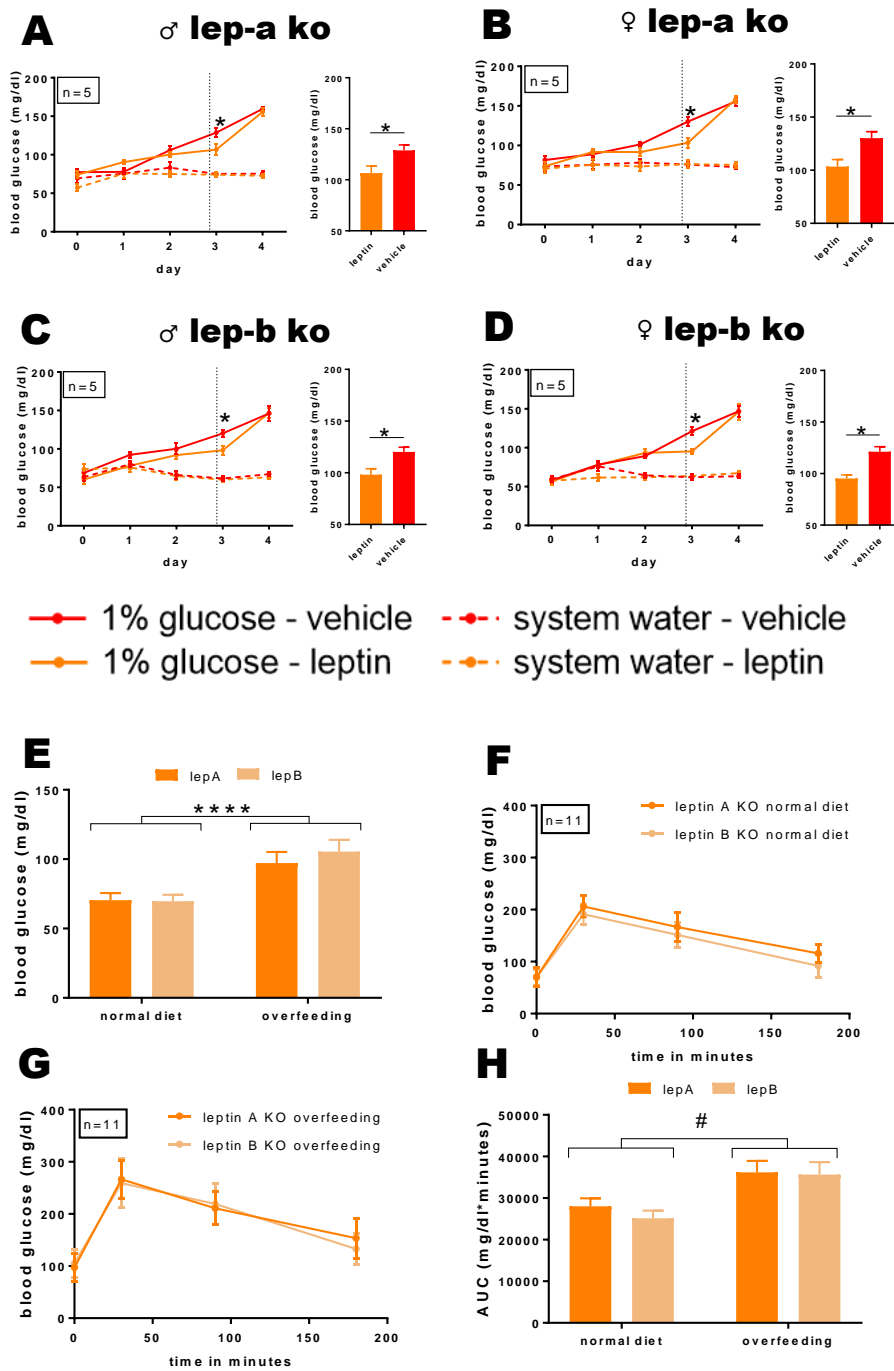

750

751 **Figure S4 Regulation of glucose homeostasis and body weight in *lepA*<sup>nz301</sup> fish and *lepB*<sup>nz302</sup> fish.**

752 (A-D) Blood glucose values of male and female *lepA*<sup>nz301</sup> fish and *lepB*<sup>nz302</sup> fish over time following immersion in a 1% glucose  
 753 solution. On the third day, one hour before blood sampling, fish were injected intraperitoneally with recombinant mouse leptin  
 754 (2mg/kg) or vehicle. \**P*<0.05, repeated measures one-way ANOVA. Data displayed as mean±SEM  
 755 (E) Baseline blood glucose levels of *lepA*<sup>nz301</sup> fish and *lepB*<sup>nz302</sup> fish. \*\*\*\**P*<0.0001, two-way ANOVA. (F) Glucose tolerance in  
 756 *lepA*<sup>nz301</sup> fish and *lepB*<sup>nz302</sup> fish (*n*=12). (G) Glucose tolerance in overfed *lepA*<sup>nz301</sup> fish and *lepB*<sup>nz302</sup> fish (*n*=12).  
 757 (H) Area under the curve of (F) and (G). \**P*<0.05, one-way ANOVA; #*P*<0.05, two-way ANOVA. Data displayed as mean ± SEM.  
 758

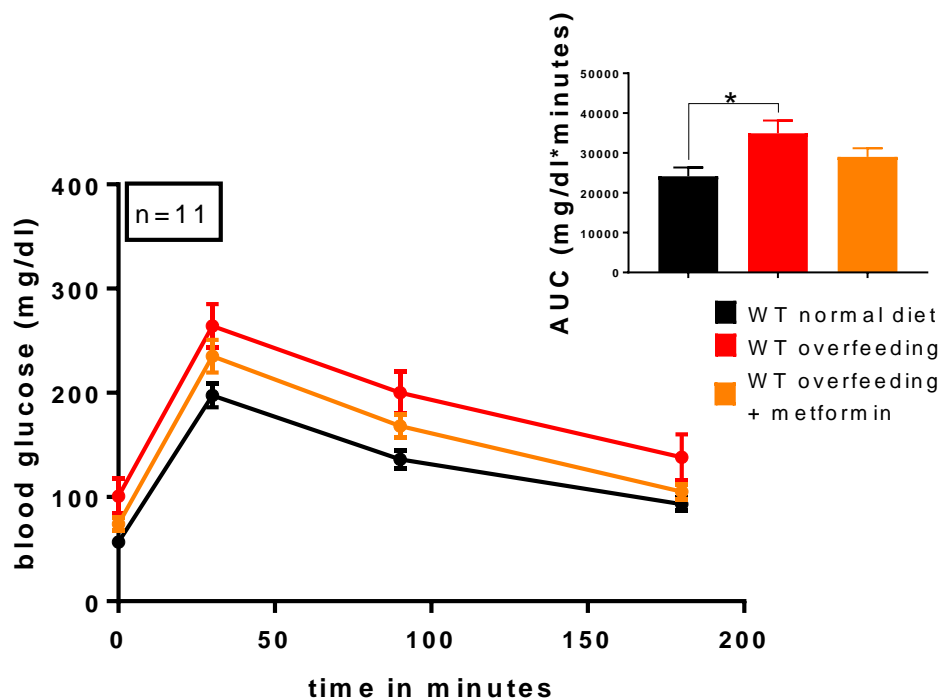

759

760 *Figure S5 Metformin improves glucose tolerance in the zebrafish.*

761 *After 5 weeks of overfeeding or normal diet, and one week of metformin (20  $\mu$ M) treatment, wild type zebrafish (n=11) were*  
762 *challenged with a 0.5mg/g glucose solution, administered via IP injection. Blood samples were taken at 0, 30, 90 and 180 minutes.*  
763 *Overfed fish had significantly impaired glucose tolerance (34950 $\pm$ 3211 mg/dl\*minutes) compared to normally fed fish*  
764 *(24147 $\pm$ 2192 mg/dl\*minutes; \*P<0.05, one-way ANOVA with multiple comparisons), but not compared to metformin-treated*  
765 *overfed fish (29033 $\pm$ 2169 mg/dl\*minutes). Main: blood glucose values over time; Insert: area under the curve of glucose tolerance*  
766 *test depicted in main figure. Data displayed as mean  $\pm$  SEM.*

767



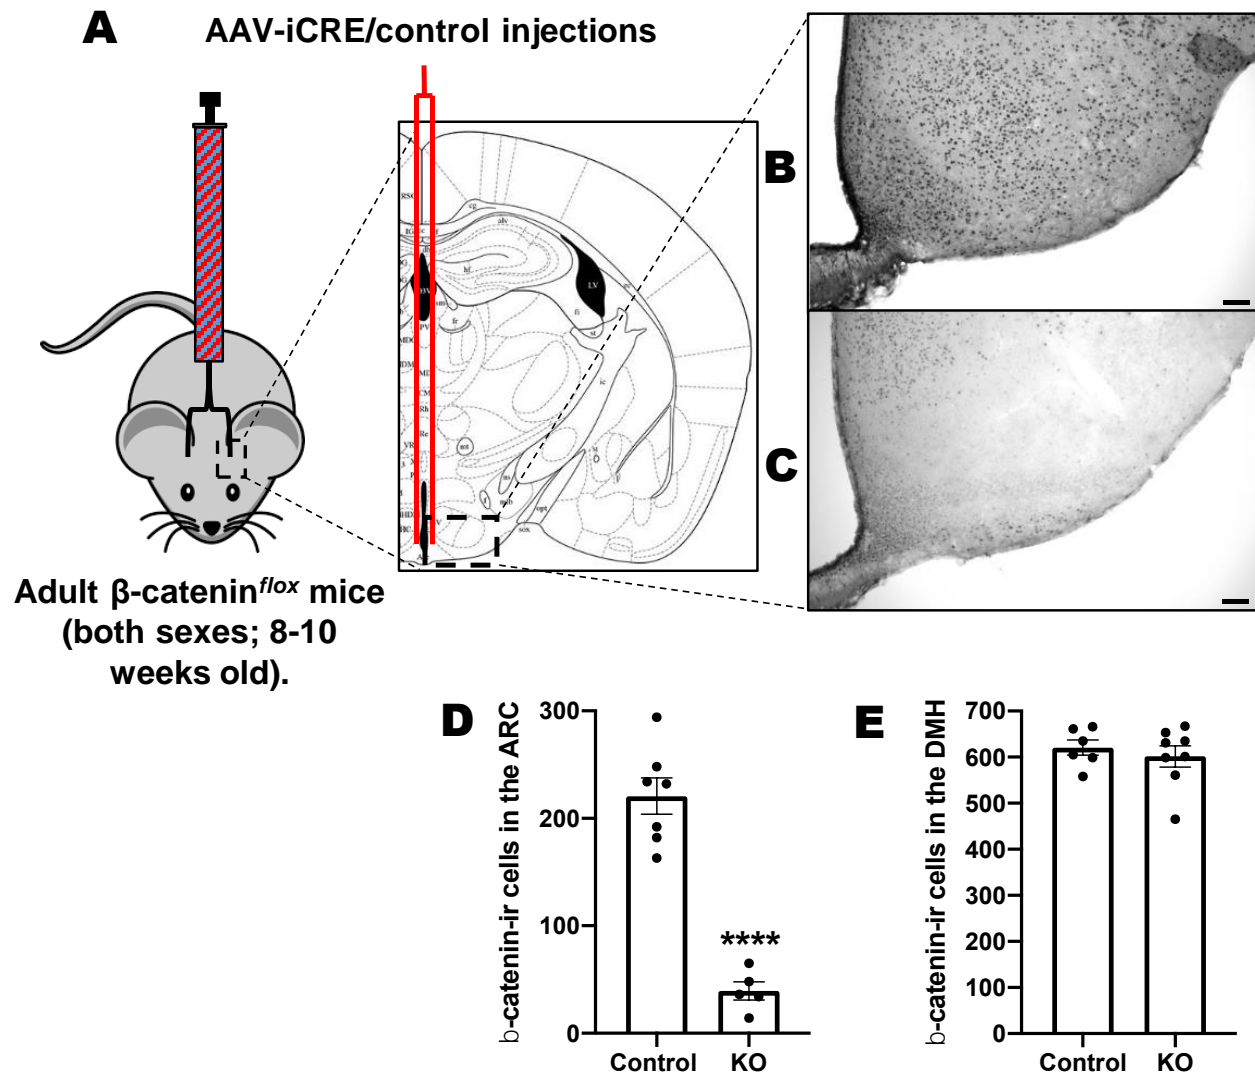

768

769 *Figure S6 Validation of conditional  $\beta$ -catenin knockout in adult mice.*

770

771 (A) Overview of injection site. (B) Representative image of  $\beta$ -catenin staining in the mediobasal hypothalamus of a control-injected

772 mouse. Scale bar = 100  $\mu$ m. (C) Representative image of  $\beta$ -catenin staining in the mediobasal hypothalamus of an AAV-iCre-

773 injected mouse. Scale bar = 100  $\mu$ m (D) Quantification of  $\beta$ -catenin-positive cells in the arcuate nucleus of AAV-iCre- vs control-

774 injected mice (\*\*\*\* $P < 0.0001$ ; Student's *t*-test). (E) Quantification of  $\beta$ -catenin-positive cells in the dorsomedial hypothalamus of

775 AAV-iCre- vs control-injected mice. No significant difference. Data displayed as mean  $\pm$  SEM.
